# Supplementary material for: Formation of multi-stereogenic centers using a catalytic diastereoselective Henry reaction
Source: Royal Society of Chemistry journal article supplement (doi:10.1039/c0cc03022h), 2010-01-01

**Formation of Multi-stereogenic Centers**  
**Using a Catalytic Diastereoselective Henry Reaction**

**Takayoshi Arai<sup>\*</sup>, Yoshinori Taneda, & Yoko Endo**

*Department of Chemistry, Graduate School of Science Chiba University*

*Inage, Chiba 263-8522, Japan*

## Experimental Section

**General Procedure of the (*R,R,R*)-L1-CuCl-Catalyzed Diastereoselective Henry Reaction with Nitromethane.** The catalyst was prepared by a complex formation of ligand (*R,R,R*)-L1 (7.1 mg, 0.011 mol), CuCl (1.0 mg, 0.01 mmol), and pyridine (1  $\mu$ L, 0.011mmol) in anhydrous dichloromethane (0.5 mL) under Ar. After being stirred for 15 min at room temperature, the solvent was removed under reduced pressure. To the residue were added nitromethane (112  $\mu$ L, 2 mmol), EtOH (0.4 mL), pyridine (21  $\mu$ L, 0.26 mmol), and (*S*)-2-phenylpropanal (27  $\mu$ L, 0.2 mmol) under Ar. The diastereoselective Henry reaction was performed for 19 h at room temperature. Then, the reaction was quenched by the addition of 1N HCl, and the aqueous layer was extracted with dichloromethane. The organic phase was washed with brine, and dried over sodium sulfate. After removal of the solvent under reduced pressure, the residue was purified by column chromatography (using spherical silica gel, *n*-hexane/ethyl acetate =6:1) to afford the adduct (27.6 mg, 71% yield). Diastereoselectivity was determined by  $^1\text{H}$  NMR and  $^{13}\text{C}$  NMR spectroscopy and the enantiomeric excess was determined by HPLC analysis.

**General Procedure of the (*R,R,R*)-L1-CuCl-Catalyzed Diastereoselective Henry Reaction with Nitroethane.** The catalyst was prepared by a complex formation of ligand (*R,R,R*)-L1 (14.2 mg, 0.022 mol) with CuCl (2.0 mg, 0.02 mmol) and pyridine (2  $\mu$ L, 0.022mmol) in anhydrous dichloromethane (1.0 mL) under Ar. After being stirred for 15 min at room temperature, the solvent was removed under reduced pressure. To the residue were added nitroethane (144  $\mu$ L, 2 mmol), EtOH (0.4 mL), pyridine (43  $\mu$ L, 0.53 mmol), and (*S*)-2-phenylpropanal (27  $\mu$ L, 0.2 mmol) under Ar. The diastereoselective Henry reaction was performed for 19 h at room temperature. Then, the reaction was quenched by the addition of 1N HCl, and the aqueous layer was extracted with dichloromethane. The organic phase was washed with brine, and then dried over sodium sulfate. After removal of the solvent under reduced pressure, the residue was purified by column chromatography (using spherical silica gel, *n*-hexane/ethyl acetate =6:1) to afford the adduct (40.4 mg, 97% yield). Diastereoselectivity was determined by  $^1\text{H}$  NMR and  $^{13}\text{C}$  NMR spectroscopy and the enantiomeric excess was determined by HPLC analysis.

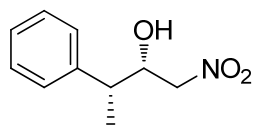

**(2*S*,3*R*)-1-nitro-3-phenylbutan-2-ol.** IR (ATR) 3420, 1553cm<sup>-1</sup>. <sup>1</sup>H-NMR (400 MHz, CDCl<sub>3</sub>) δ 7.37-7.18 (m, 5H), 4.43-4.37 (m, 1H), 4.30-4.20 (m, 2H), 2.83 (quintet, 1H, *J*=7.3 Hz), 2.61-2.58 (m, 1H), 1.42 (d, 3H, *J*= 7.3 Hz). <sup>13</sup>C-NMR (100 MHz, CDCl<sub>3</sub>) δ 141.94, 129.02, 127.38, 79.40, 73.22, 43.66, 17.37. HRMS (ES<sup>-</sup>): Exact mass calcd for C<sub>10</sub>H<sub>12</sub>NO<sub>3</sub> [M - H]<sup>-</sup>, 194.0823. Found 194.0821. [α]<sub>D</sub><sup>26</sup> -12.78 (c 1.00, CHCl<sub>3</sub>). The diastereoselectivity was determined by <sup>1</sup>H NMR spectroscopy.

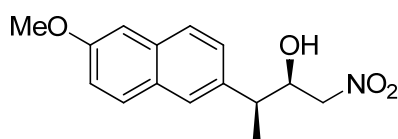

**(2*R*,3*S*)-3-(6-methoxynaphthalen-2-yl)-1-nitrobutan-2-ol.** IR (ATR) 3566, 2968, 2935, 1606, 1554cm<sup>-1</sup>. <sup>1</sup>H-NMR (400 MHz, CDCl<sub>3</sub>) δ 7.72 (d, 1H, *J*=8.6 Hz), 7.69 (d, 1H, *J*=9.1 Hz), 7.55 (s, 1H), 7.29-7.10 (m, 3H), 4.46 (dt, 1H, *J*=2.7, 8.2 Hz), 4.32-4.20 (m, 2H), 3.91 (s, 3H), 2.94 (quintet, 1H, *J*=7.3 Hz), 2.77 (br, 1H), 1.47 (d, 3H, *J*=6.8 Hz). <sup>13</sup>C-NMR (100 MHz, CDCl<sub>3</sub>) δ 157.69, 136.95, 133.73, 129.10, 128.92, 127.66, 126.01, 125.74, 119.29, 105.53, 79.48, 73.24, 55.29, 43.59, 17.44. HRMS (ES<sup>-</sup>): Exact mass calcd for C<sub>15</sub>H<sub>16</sub>NO<sub>4</sub> [M - H]<sup>-</sup>, 274.1085. Found 274.1096. [α]<sub>D</sub><sup>22</sup> +11.45 (c 1.00, CHCl<sub>3</sub>). The diastereoselectivity was determined by <sup>1</sup>H NMR spectroscopy.

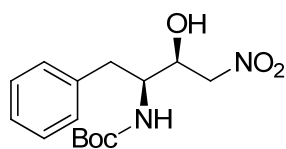

***tert*-butyl ((2*S*,3*S*)-3-hydroxy-4-nitro-1-phenylbutan-2-yl) carbamate.** IR (ATR) 3396, 2979, 2931, 1685, 1556cm<sup>-1</sup>. <sup>1</sup>H-NMR (400 MHz, CDCl<sub>3</sub>) δ 7.34-7.22 (m, 5H), 4.88 (br, 1H), 4.51-4.40 (m, 2H), 4.32-4.27 (m, 1H), 3.81 (q, 1H, *J*=8.2 Hz), 3.36 (br, 1H), 3.01-2.90 (m, 2H), 1.42 (s, 9H). <sup>13</sup>C-NMR (100 MHz, CDCl<sub>3</sub>) δ 155.93, 137.16, 129.20, 128.68, 126.79, 80.27, 79.21, 68.42, 53.86, 38.13, 28.22. HRMS (ES<sup>+</sup>): Exact mass calcd for C<sub>15</sub>H<sub>22</sub>N<sub>2</sub>O<sub>5</sub>Na [M + H]<sup>+</sup>, 333.1421. Found 333.1413. [α]<sub>D</sub><sup>25</sup> -34.80 (c 1.00, CHCl<sub>3</sub>). The diastereoselectivity was determined by <sup>1</sup>H NMR spectroscopy.

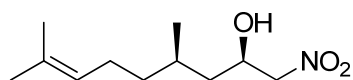

**(2*R*,4*R*)-4,8-dimethyl-1-nitronon-7-en-2-ol.** IR (ATR) 3734, 2918, 1555cm<sup>-1</sup>. <sup>1</sup>H-NMR (400 MHz, CDCl<sub>3</sub>) δ 5.12-5.05 (m, 1H), 4.46-4.31 (m, 3H), 2.49 (d, 1H, *J*=4.5 Hz), 2.08-1.90 (m, 2H), 1.69 (s, 3H), 1.66-1.57 (m, 1H), 1.61 (s, 3H), 1.50-1.12 (m, 4H), 0.97 (d, 3H, *J*=6.8 Hz). <sup>13</sup>C-NMR (100 MHz, CDCl<sub>3</sub>) δ 131.67, 124.20, 80.76, 66.96, 40.88, 36.27, 28.89, 25.68, 25.17, 19.96, 17.65. HRMS (ES<sup>-</sup>): Exact mass calcd for C<sub>11</sub>H<sub>20</sub>NO<sub>3</sub> [M - H]<sup>-</sup>, 214.1449. Found 214.1452. [α]<sub>D</sub><sup>26</sup> -0.24 (c 1.00, CHCl<sub>3</sub>). The diastereoselectivity was determined by <sup>1</sup>H NMR and <sup>13</sup>C NMR spectroscopy.

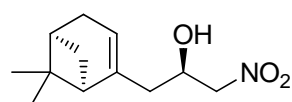

**(*R*)-1-((1*R*,5*S*)-6,6-dimethylbicyclo[3.1.1]hept-2-en-yl)-3-nitropropan-2-ol.** IR (ATR) 3734, 2917, 1556 $\text{cm}^{-1}$ .  $^1\text{H-NMR}$  (400 MHz,  $\text{CDCl}_3$ )  $\delta$  5.41 (br, 1H), 4.48-4.31 (m, 3H), 2.46-2.04 (m, 8H), 1.29 (s, 3H), 1.13 (d, 1H,  $J=8.6$  Hz), 0.85 (s, 3H).  $^{13}\text{C-NMR}$  (125 MHz,  $\text{CDCl}_3$ )  $\delta$  143.03, 121.74, 80.23, 66.47, 45.64, 41.69, 40.45, 37.96, 31.88, 31.36, 26.11, 21.19. HRMS (ES $^-$ ): Exact mass calcd for  $\text{C}_{12}\text{H}_{18}\text{NO}_3$  [ $\text{M} - \text{H}$ ] $^-$ , 224.1292. Found 224.1296.  $[\alpha]_{\text{D}}^{25}$  -19.11 (c 1.00,  $\text{CHCl}_3$ ). The diastereoselectivity was determined by  $^1\text{H}$  NMR and  $^{13}\text{C}$  NMR spectroscopy.

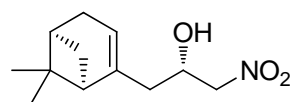

**(*S*)-1-((1*R*,5*S*)-6,6-dimethylbicyclo[3.1.1]hept-2-en-yl)-3-nitropropan-2-ol.**  $^1\text{H-NMR}$  (400 MHz,  $\text{CDCl}_3$ )  $\delta$  5.40 (br, 1H), 4.47-4.32 (m, 3H), 2.46-2.05 (m, 8H), 1.30 (s, 3H), 1.13 (d, 1H,  $J=8.6$  Hz), 0.85 (s, 3H).  $^{13}\text{C-NMR}$  (100 MHz,  $\text{CDCl}_3$ )  $\delta$  142.94, 121.65, 80.38, 66.62, 45.85, 41.85, 40.54, 38.01, 31.81, 31.49, 26.20, 21.25.  $[\alpha]_{\text{D}}^{26}$  -21.85 (c 1.00,  $\text{CHCl}_3$ ). diastereoselectivity was determined by  $^1\text{H}$  NMR and  $^{13}\text{C}$  NMR spectroscopy.

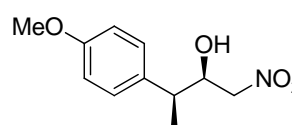

**(*2R,3S*)-3-(4-methoxyphenyl)-1-nitrobutan-2-ol.** IR (ATR) 3456, 2966, 2933, 1553, 1513 $\text{cm}^{-1}$ .  $^1\text{H-NMR}$  (500 MHz,  $\text{CDCl}_3$ )  $\delta$  7.13-7.10 (m, 2H), 6.90-6.86 (m, 2H), 4.48-4.23 (m, 3H), 3.80 (s, 3H), 2.80 (quintet, 1H,  $J=7.5$  Hz), 2.56 (d, 1H,  $J=5.2$  Hz), 1.39 (d, 3H,  $J=7.5$  Hz).  $^{13}\text{C-NMR}$  (125 MHz,  $\text{CDCl}_3$ )  $\delta$  158.71, 133.89, 128.34, 114.36, 79.45, 73.43, 55.24, 42.83, 17.49. HRMS (ES $^-$ ): Exact mass calcd for  $\text{C}_{11}\text{H}_{14}\text{NO}_4$  [ $\text{M} - \text{H}$ ] $^-$ , 224.0928. Found 224.0931.  $[\alpha]_{\text{D}}^{23}$  +7.54 (c 1.00,  $\text{CHCl}_3$ ). The diastereo ratio was determined by  $^1\text{H}$  NMR spectroscopy.

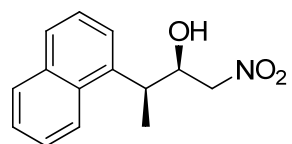

**(*2R,3S*)-3-(naphthalen-1-yl)-1-nitrobutan-2-ol.** IR (ATR) 3539, 3049, 2932, 1553 $\text{cm}^{-1}$ .  $^1\text{H-NMR}$  (500 MHz,  $\text{CDCl}_3$ )  $\delta$  8.05 (d, 1H,  $J=8.6$  Hz), 7.89 (d, 1H,  $J=8.0$  Hz), 7.79 (d, 1H,  $J=7.5$  Hz), 7.59-7.42 (m, 4H), 4.64 (br, 1H), 4.42-4.34 (m, 1H), 4.25-4.22 (m, 1H), 3.77 (quintet, 1H,  $J=6.9$  Hz), 2.57 (br, 1H), 1.55 (d, 3H,  $J=6.9$  Hz).  $^{13}\text{C-NMR}$  (125 MHz,  $\text{CDCl}_3$ )  $\delta$  138.18, 134.08, 131.17, 129.26, 127.76, 126.60, 125.87, 125.57, 124.03, 122.33, 79.30, 73.02, 17.18. HRMS (ES $^-$ ): Exact mass calcd for  $\text{C}_{14}\text{H}_{14}\text{NO}_3$  [ $\text{M} - \text{H}$ ] $^-$ , 244.0979. Found 244.0984.  $[\alpha]_{\text{D}}^{23}$  +67.58 (c 1.00,  $\text{CHCl}_3$ ). The diastereo ratio was determined by  $^1\text{H}$  NMR spectroscopy.

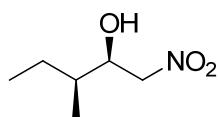

**(2*R*,3*S*)-3-methyl-1-nitropentan-2-ol.** IR (ATR) 3455, 2964, 2929, 1554 $\text{cm}^{-1}$ .  $^1\text{H-NMR}$  (500 MHz,  $\text{CDCl}_3$ )  $\delta$  4.49-4.39 (m, 2H), 4.30-4.26 (m, 1H), 2.37 (d, 1H,  $J=4.6$  Hz), 1.66-1.50 (m, 2H), 1.29-1.18 (m, 1H), 0.96-0.94 (m, 6H).  $^{13}\text{C-NMR}$  (125 MHz,  $\text{CDCl}_3$ )  $\delta$  79.52, 71.53, 38.20, 25.51, 13.68, 11.54. HRMS (ES $^-$ ): Exact mass calcd for  $\text{C}_6\text{H}_{12}\text{NO}_3$   $[\text{M} - \text{H}]^-$ , 146.0823. Found 146.0817.  $[\alpha]_{\text{D}}^{23}$  -3.08 (c 1.00,  $\text{CHCl}_3$ ). The diastereoselectivity was determined by  $^1\text{H}$  NMR spectroscopy.

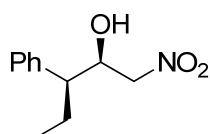

**(2*R*,3*S*)-1-nitro-3-phenylpentan-2-ol.** IR (ATR) 3555, 2965, 2931, 1553 $\text{cm}^{-1}$ .  $^1\text{H-NMR}$  (500 MHz,  $\text{CDCl}_3$ )  $\delta$  7.37-7.13 (m, 5H), 4.58-4.14 (m, 3H), 2.67 (d, 1H,  $J=5.7$  Hz), 2.62-2.52 (m, 1H), 2.19-1.60 (m, 2H), 0.77 (t, 3H,  $J=7.5$  Hz).  $^{13}\text{C-NMR}$  (125 MHz,  $\text{CDCl}_3$ )  $\delta$  139.80, 129.04, 128.78, 128.04, 127.43, 79.65, 72.54, 51.61, 24.68, 11.69. HRMS (ES $^-$ ): Exact mass calcd for  $\text{C}_{11}\text{H}_{14}\text{NO}_3$   $[\text{M} - \text{H}]^-$ , 208.0979. Found 208.0980.  $[\alpha]_{\text{D}}^{23}$  +2.82 (c 1.00,  $\text{CHCl}_3$ ). The diastereoselectivity was determined by  $^1\text{H}$  NMR spectroscopy.

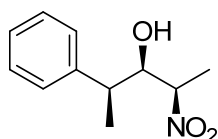

**(2*R*,3*R*,4*S*)-2-nitro-4-phenylpentan-3-ol.** IR (ATR) 3566, 1549 $\text{cm}^{-1}$ .  $^1\text{H-NMR}$  (400 MHz,  $\text{CDCl}_3$ )  $\delta$  7.37-7.17 (m, 5H), 4.54-4.47 (m, 1H), 3.90-3.85 (m, 1H), 2.90 (quintet, 1H,  $J=6.8$  Hz), 2.30-2.29 (m, 1H), 1.59 (d, 3H,  $J=6.8$  Hz), 1.37 (d, 3H,  $J=6.8$  Hz).  $^{13}\text{C-NMR}$  (100 MHz,  $\text{CDCl}_3$ )  $\delta$  142.62, 128.86, 127.63, 127.17, 84.91, 77.25, 42.19, 16.82, 15.27. HRMS (ES $^-$ ): Exact mass calcd for  $\text{C}_{11}\text{H}_{14}\text{NO}_3$   $[\text{M} - \text{H}]^-$ , 208.0979. Found 208.0978.  $[\alpha]_{\text{D}}^{22}$  +41.26 (c 1.00,  $\text{CHCl}_3$ ). The diastereoselectivity was determined by  $^1\text{H}$  NMR spectroscopy.

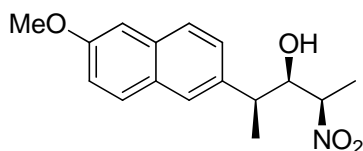

**(2*S*,3*R*,4*R*)-2-(6-methoxynaphthalen-2-yl)-4-nitropentan-3-ol** IR (ATR) 3734, 1558 $\text{cm}^{-1}$ .  $^1\text{H-NMR}$  (400 MHz,  $\text{CDCl}_3$ )  $\delta$  7.74-7.69 (m, 2H), 7.58 (s, 1H), 7.32-7.11 (m, 3H), 4.54 (quintet, 1H,  $J=6.8$  Hz), 3.95 (q, 1H,  $J=6.8$  Hz), 3.92 (s, 3H), 3.04 (quintet, 1H,  $J=6.8$  Hz), 2.33 (d, 1H,  $J=7.3$  Hz), 1.59 (d, 3H,  $J=6.8$  Hz), 1.44 (d, 3H,  $J=6.8$  Hz).  $^{13}\text{C-NMR}$  (100 MHz,  $\text{CDCl}_3$ )  $\delta$  157.69, 137.60, 133.68, 129.18, 128.94, 127.48, 126.19, 119.21, 105.53, 84.92, 55.32, 42.18, 16.87, 15.41. HRMS (ES $^+$ ): Exact mass calcd for  $\text{C}_{16}\text{H}_{19}\text{NO}_4\text{Na}$   $[\text{M} + \text{H}]^+$ , 312.1206. Found 312.1205.  $[\alpha]_{\text{D}}^{22}$  +35.30 (c 1.00,  $\text{CHCl}_3$ ). The diastereoselectivity was determined by  $^1\text{H}$  NMR spectroscopy.

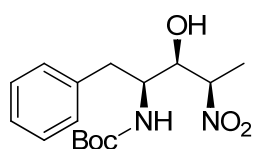

**tert-butyl ((2*S*,3*R*,4*R*)-3-hydroxy-4-nitro-1-phenylpentan-2-yl) carbamate.** IR (ATR) 3749, 3394, 2979, 2929, 1685, 1556 $\text{cm}^{-1}$ .  $^1\text{H-NMR}$  (400 MHz,  $\text{CDCl}_3$ )  $\delta$  7.34-7.21 (m, 5H), 4.87 (d, 1H,  $J=9.5$  Hz), 4.62-4.55 (m, 1H), 3.96-3.89 (m, 2H), 3.02-2.87 (m, 3H), 1.49 (d, 3H,  $J=6.8$  Hz), 1.40 (s, 9H).  $^{13}\text{C-NMR}$  (100 MHz,  $\text{CDCl}_3$ )  $\delta$  155.77, 137.24, 129.14, 128.76, 126.83, 86.78, 80.19, 72.85, 52.18, 38.68, 28.23, 16.04. HRMS (ES $^+$ ): Exact mass calcd for  $\text{C}_{16}\text{H}_{24}\text{N}_2\text{O}_5\text{Na}$   $[\text{M} + \text{H}]^+$ , 347.1577. Found 347.1565.  $[\alpha]_{\text{D}}^{25}$  -30.77 (c 1.00,  $\text{CHCl}_3$ ). The diastereoselectivity was determined by  $^1\text{H}$  NMR spectroscopy.

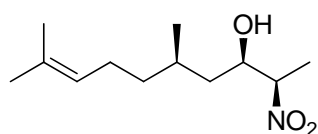

**(2*R*,3*R*,5*R*)-5,9-dimethyl-2-nitrodec-8-en-3-ol.** IR (ATR) 3566, 2968, 2935, 1606, 1554 $\text{cm}^{-1}$ .  $^1\text{H-NMR}$  (400 MHz,  $\text{CDCl}_3$ )  $\delta$  5.12-5.05 (m, 1H), 4.55-4.45 (m, 1H), 4.33-3.94 (m, 1H), 2.18 (d, 1H,  $J=7.3$  Hz), 2.09-1.89 (m, 2H), 1.78-1.70 (m, 1H), 1.69 (s, 3H), 1.61 (s, 3H), 1.56 (d, 3H,  $J=6.8$  Hz), 1.51-1.07 (m, 4H), 0.96 (d, 3H,  $J=6.8$  Hz).  $^{13}\text{C-NMR}$  (100 MHz,  $\text{CDCl}_3$ )  $\delta$  131.61, 124.31, 87.92, 71.13, 40.49, 35.73, 28.85, 25.67, 25.13, 20.34, 17.63, 16.22. HRMS (ES $^-$ ): Exact mass calcd for  $\text{C}_{12}\text{H}_{22}\text{NO}_3$   $[\text{M} - \text{H}]^-$ , 228.1605. Found 228.1609.  $[\alpha]_{\text{D}}^{26}$  +22.30 (c 1.00,  $\text{CHCl}_3$ ). The diastereoselectivity was determined by  $^1\text{H}$  NMR and  $^{13}\text{C}$  NMR spectroscopy.

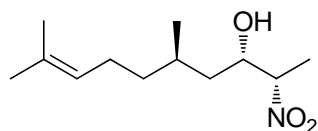

**(2*S*,3*S*,5*R*)-5,9-dimethyl-2-nitrodec-8-en-3-ol.**  $^1\text{H-NMR}$  (400 MHz,  $\text{CDCl}_3$ )  $\delta$  5.11-5.05 (m, 1H), 4.55-4.45 (m, 1H), 4.33-3.94 (m, 1H), 2.15 (d, 1H,  $J=6.8$  Hz), 2.07-1.92 (m, 2H), 1.80-1.69 (m, 1H), 1.68 (s, 3H), 1.60 (s, 3H), 1.56 (d, 3H,  $J=6.8$  Hz), 1.52-1.07 (m, 4H), 0.93 (d, 3H,  $J=6.8$  Hz).  $^{13}\text{C-NMR}$  (100 MHz,  $\text{CDCl}_3$ )  $\delta$  131.49, 124.29, 88.33, 70.86, 40.01, 37.78, 28.42, 25.66, 25.34, 18.68, 17.61, 16.18.  $[\alpha]_{\text{D}}^{26}$  -13.30 (c 1.00,  $\text{CHCl}_3$ ). The diastereoselectivity was determined by  $^1\text{H}$  NMR and  $^{13}\text{C}$  NMR spectroscopy.

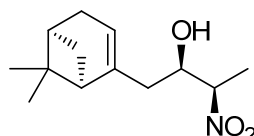

**(2*R*,3*R*)-1-((1*R*,5*S*)-6,6-dimethylbicyclo[3.1.1]hept-2-en-2-yl)-3-nitrobutan-2-ol.** IR (ATR) 3525, 2985, 2916, 1550 $\text{cm}^{-1}$ .  $^1\text{H-NMR}$  (400 MHz,  $\text{CDCl}_3$ )  $\delta$  5.44-5.35 (m, 1H), 4.59-4.48 (m, 1H), 4.22-3.87 (m, 1H), 2.46-2.03 (m, 8H), 1.59-1.54 (m, 3H), 1.30 (s, 3H), 1.11 (d, 1H,  $J=8.6$  Hz), 0.86 (s, 3H).  $^{13}\text{C-NMR}$  (100 MHz,  $\text{CDCl}_3$ )  $\delta$  143.22, 122.20, 87.13, 70.00, 45.38, 40.87, 40.50, 38.08, 31.40, 26.15, 21.14, 21.09, 15.81. HRMS (ES $^-$ ): Exact mass calcd for  $\text{C}_{13}\text{H}_{20}\text{NO}_3$   $[\text{M} - \text{H}]^-$ , 238.1449. Found 238.1454.  $[\alpha]_{\text{D}}^{25}$  -9.63 (c 1.00,  $\text{CHCl}_3$ ). The diastereoselectivity was determined by  $^1\text{H}$  NMR and  $^{13}\text{C}$  NMR spectroscopy.

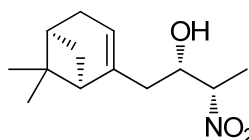

**(2*S*,3*S*)-1-((1*R*,5*S*)-6,6-dimethylbicyclo[3.1.1]hept-2-en-2-yl)-3-nitrobutan-2-ol.**  $^1\text{H-NMR}$  (400 MHz,  $\text{CDCl}_3$ )  $\delta$  5.44-5.39 (m, 1H), 4.59-4.48 (m, 1H), 4.22-3.87 (m, 1H), 2.46-2.02 (m, 8H), 1.59-1.54 (m, 3H), 1.30 (s, 3H), 1.17 (d, 1H,  $J=8.6$  Hz), 0.85 (s, 3H).  $^{13}\text{C-NMR}$  (100 MHz,  $\text{CDCl}_3$ )  $\delta$  142.84, 121.84, 86.99, 70.27, 45.85, 40.68, 37.74, 31.68, 31.41, 26.08, 21.25, 21.16, 15.96.  $[\alpha]_{\text{D}}^{25}$  -29.65 (c 1.00,  $\text{CHCl}_3$ ). The diastereoselectivity was determined by  $^1\text{H}$  NMR and  $^{13}\text{C}$  NMR spectroscopy.

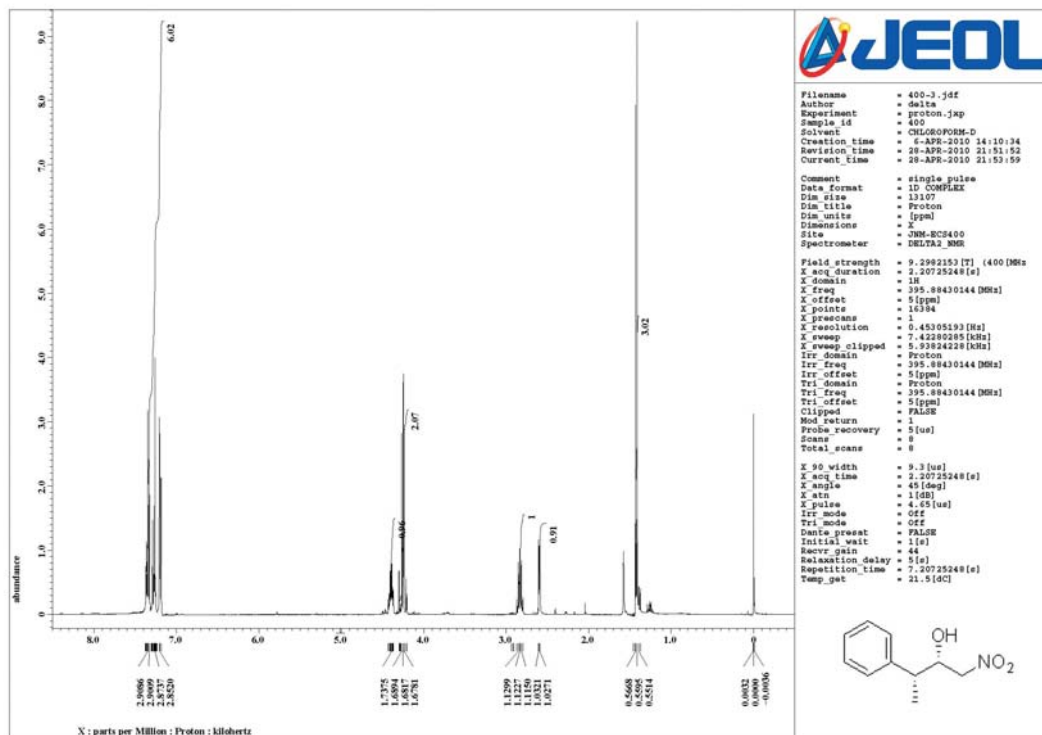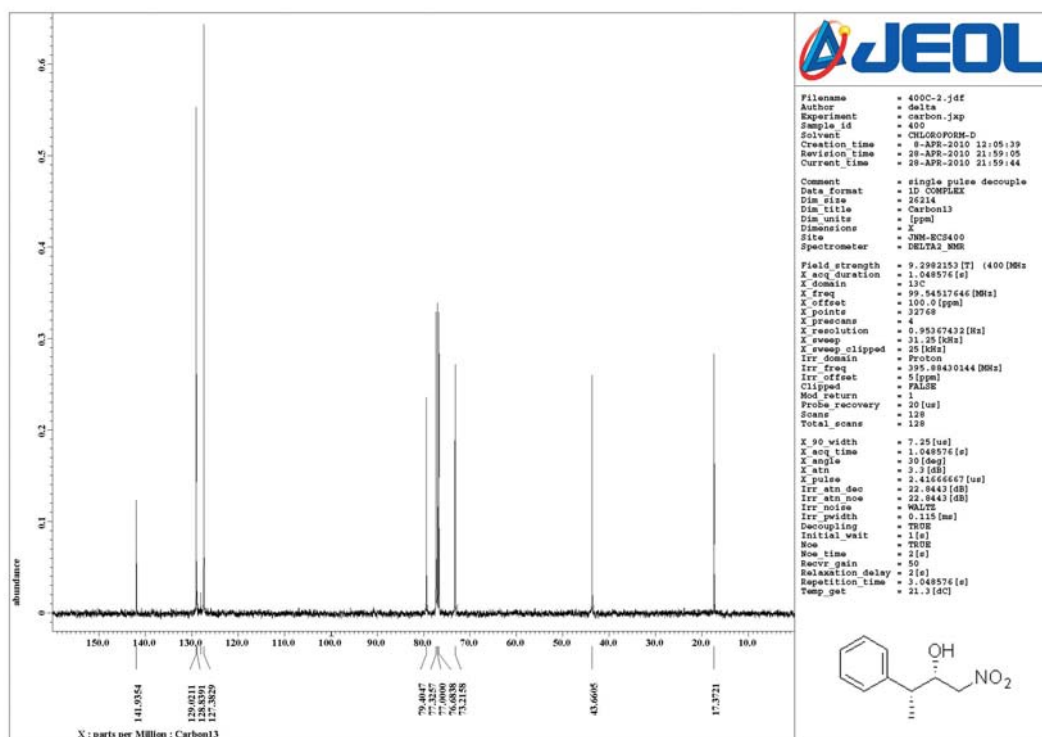



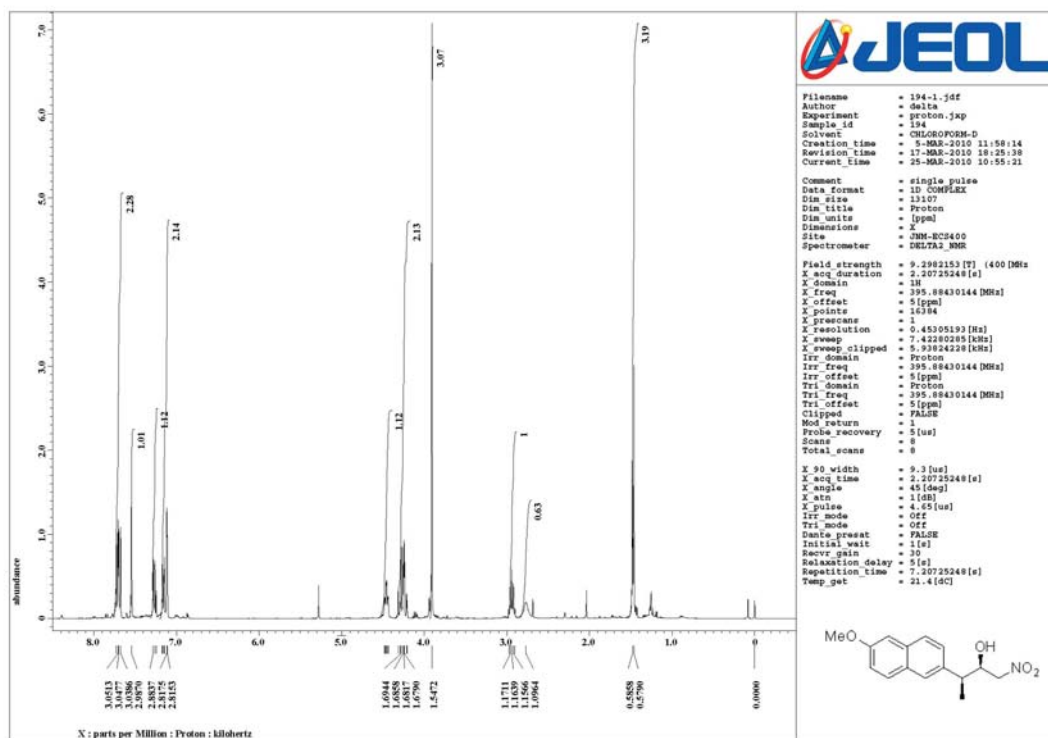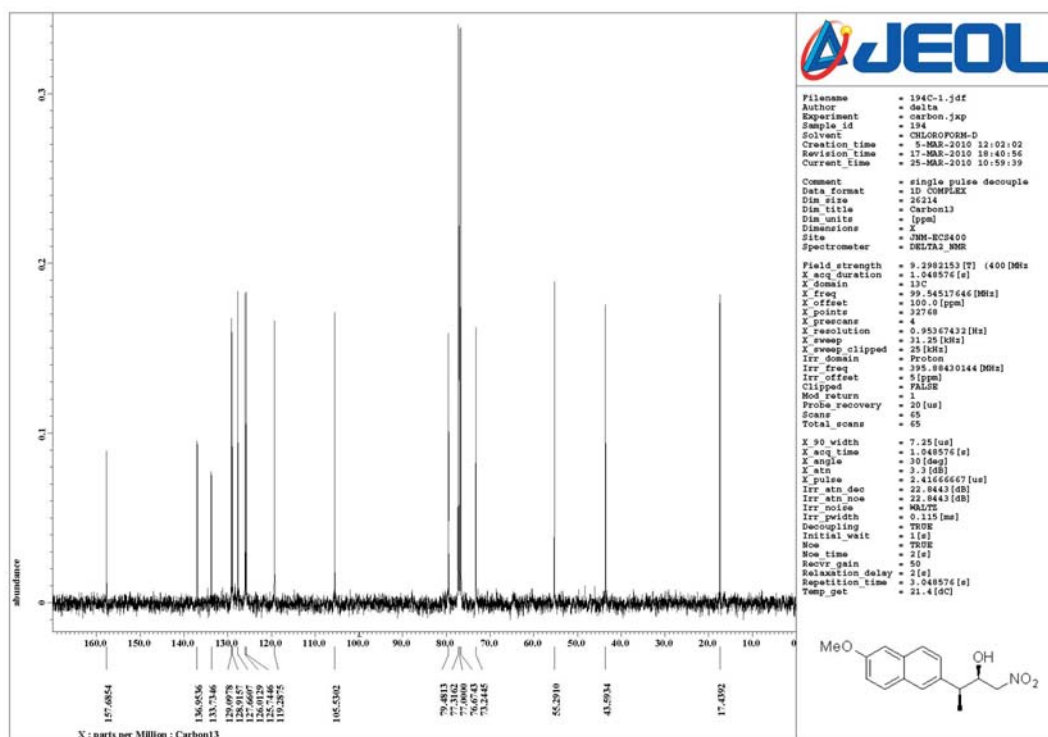

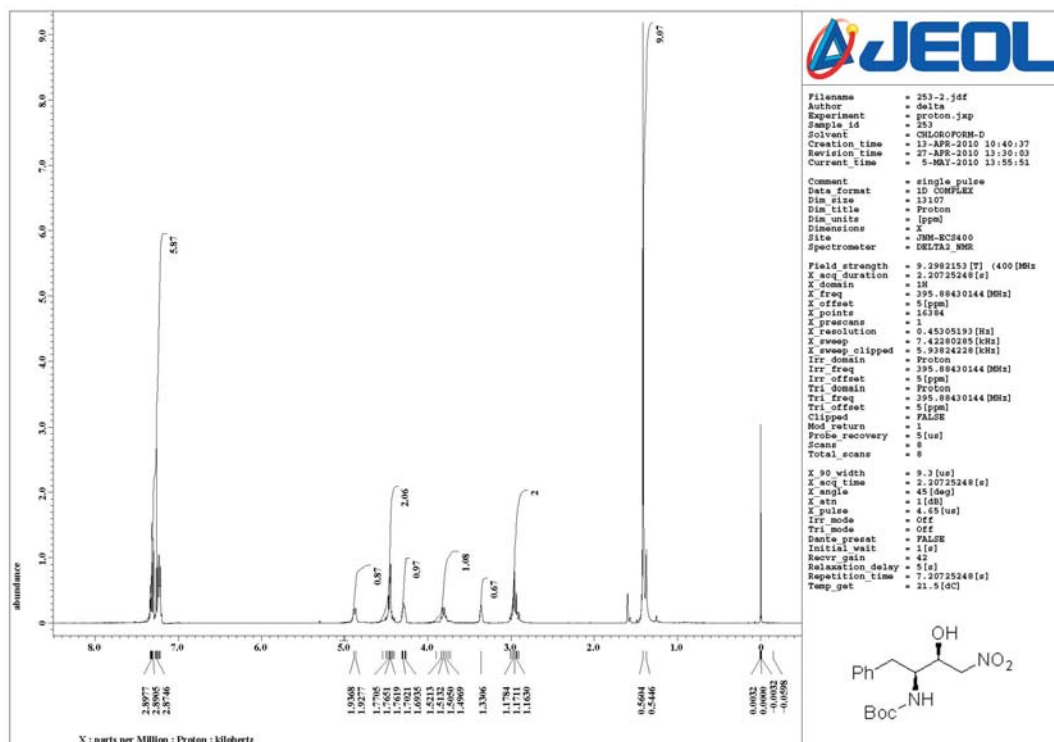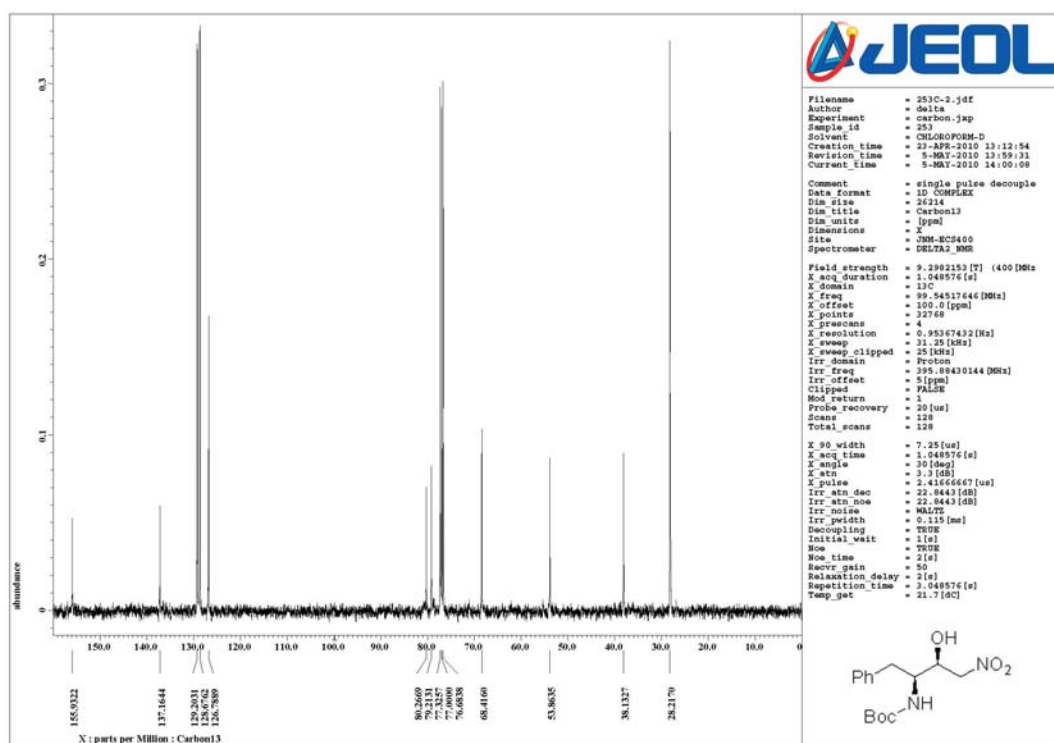

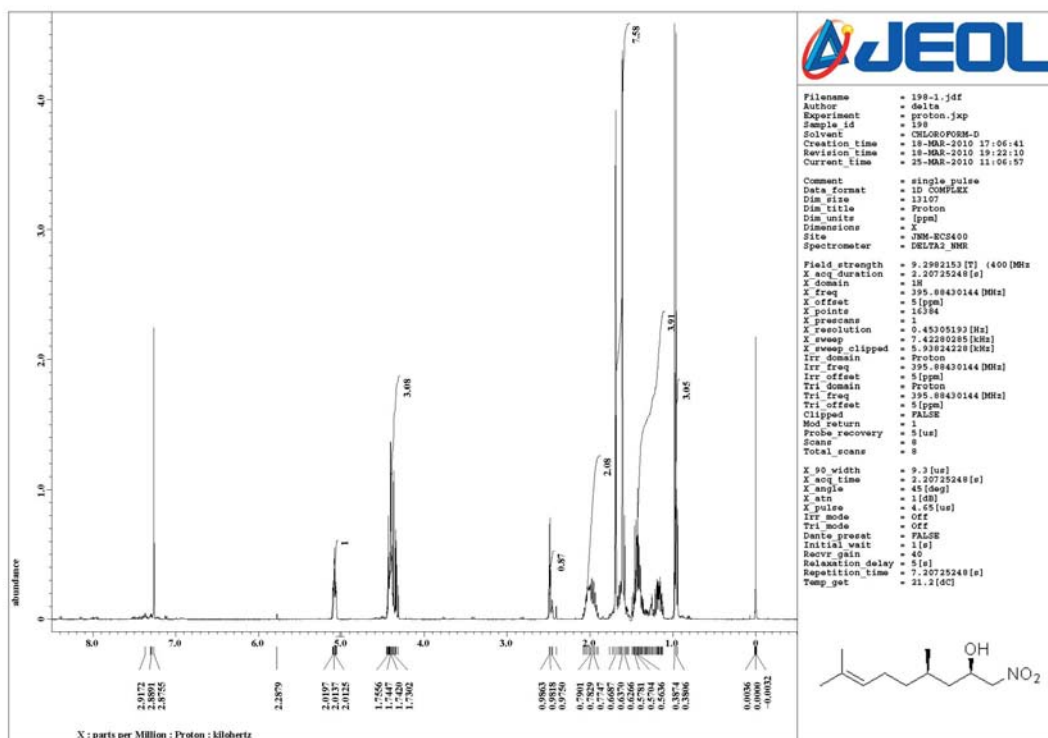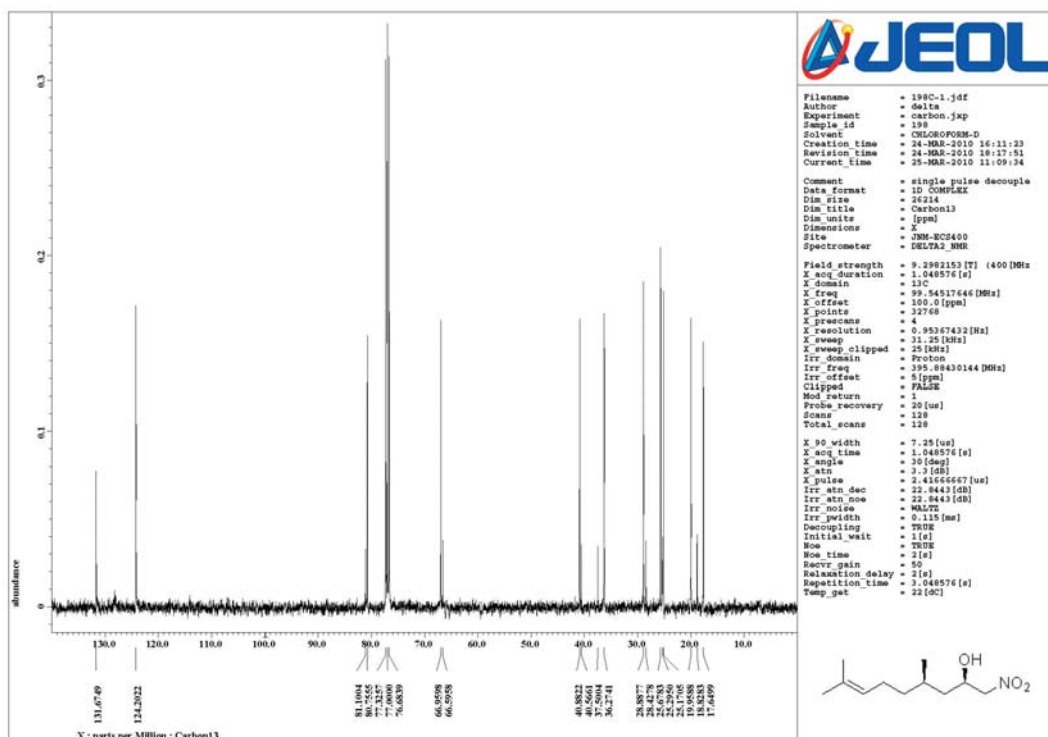

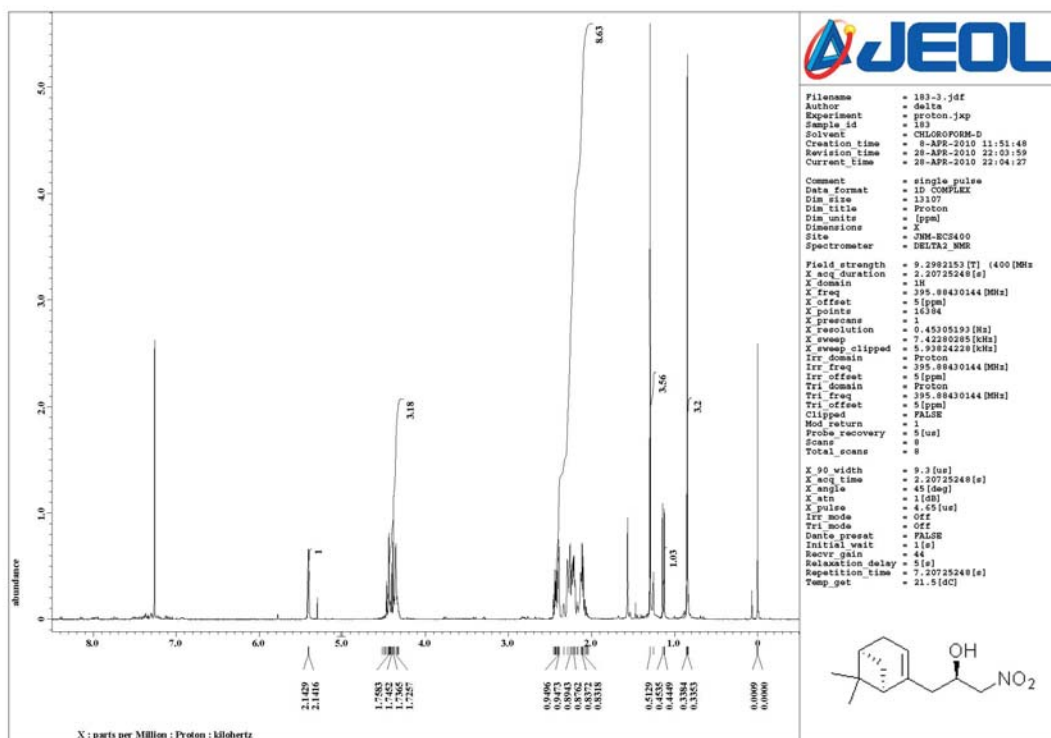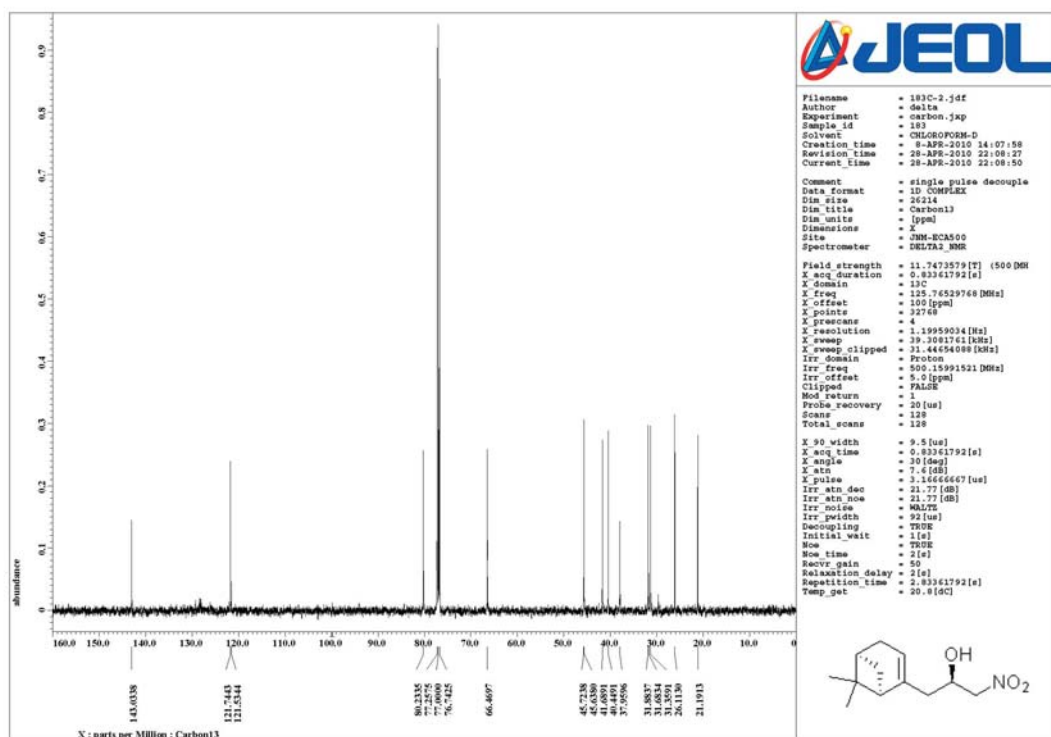

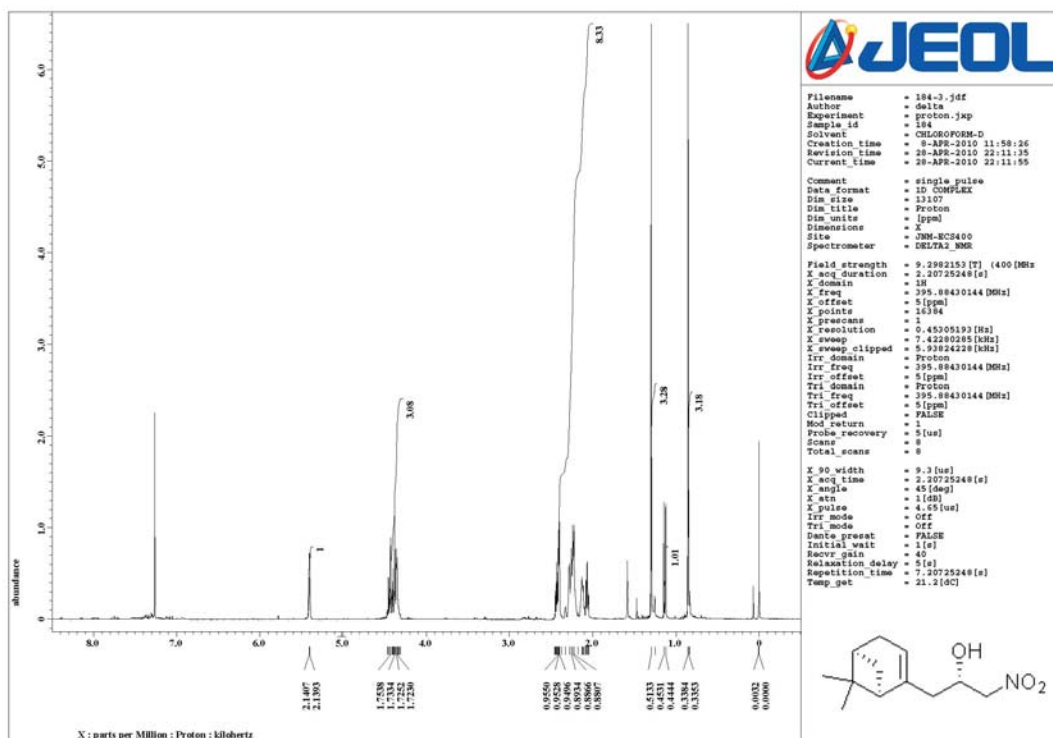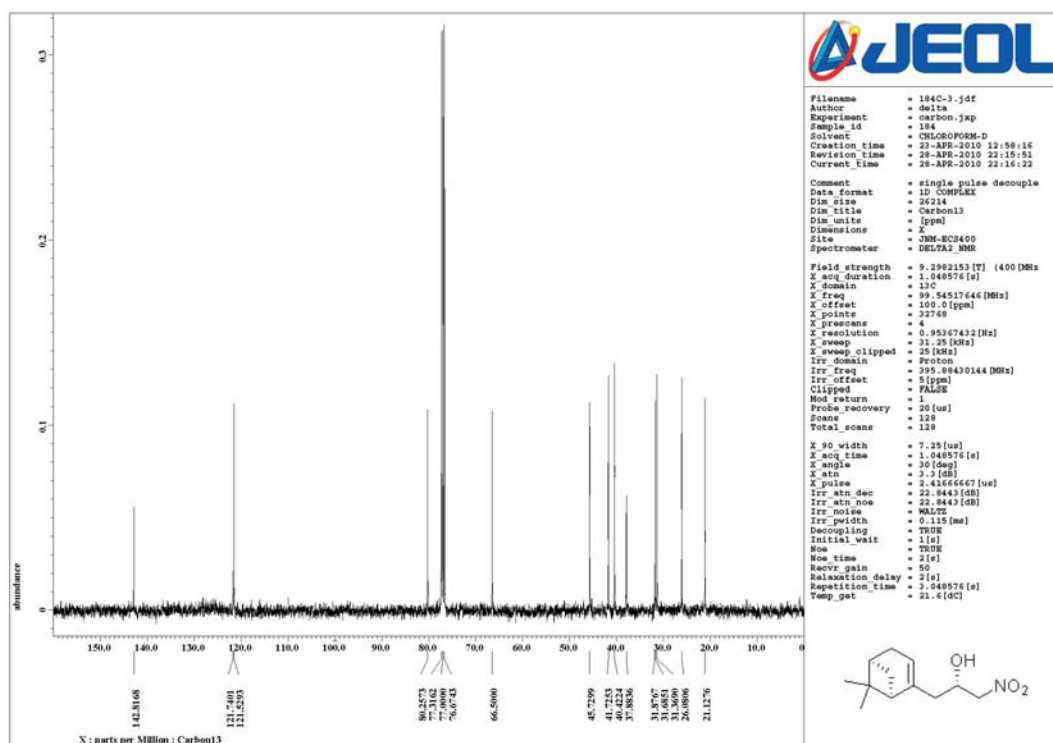

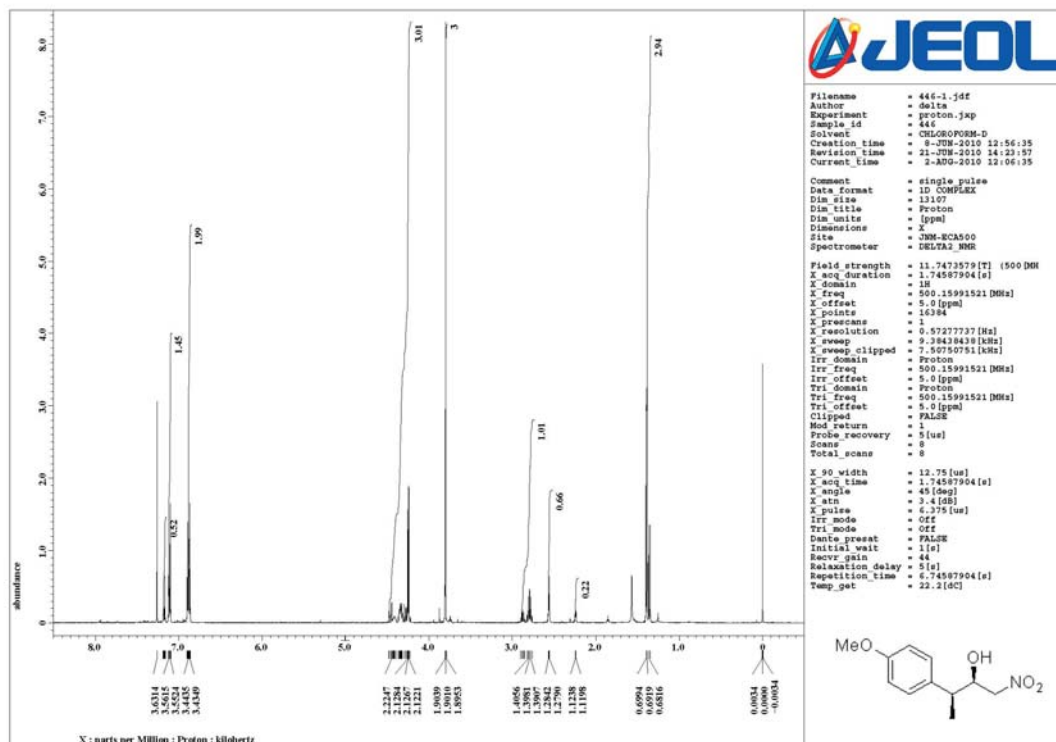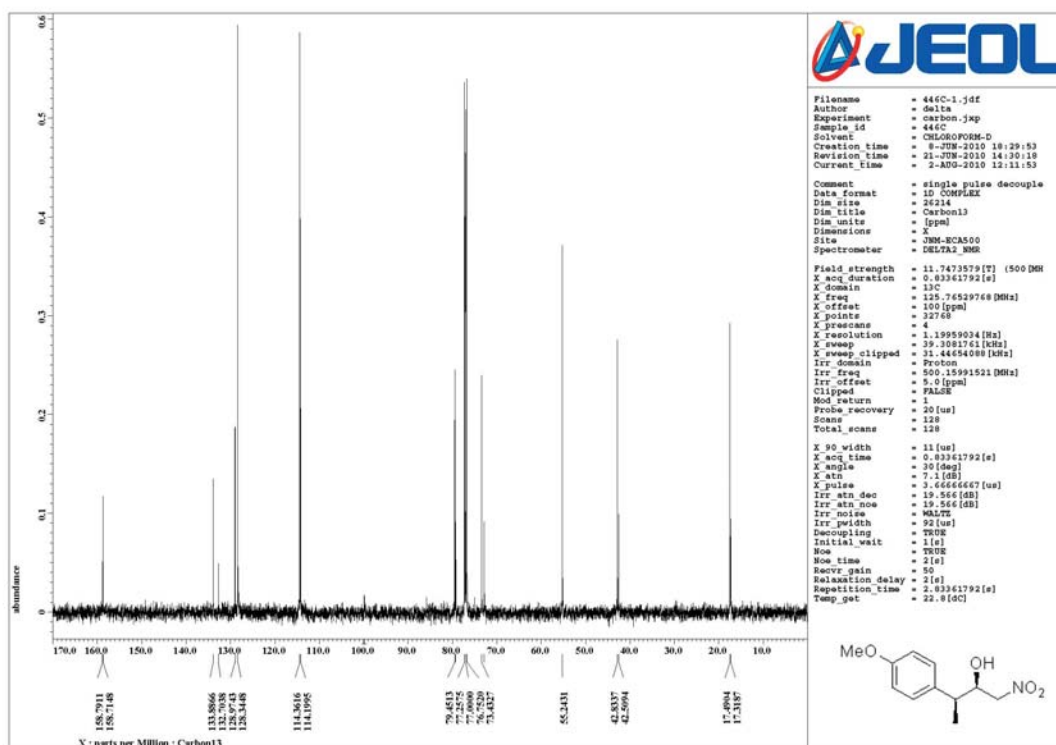



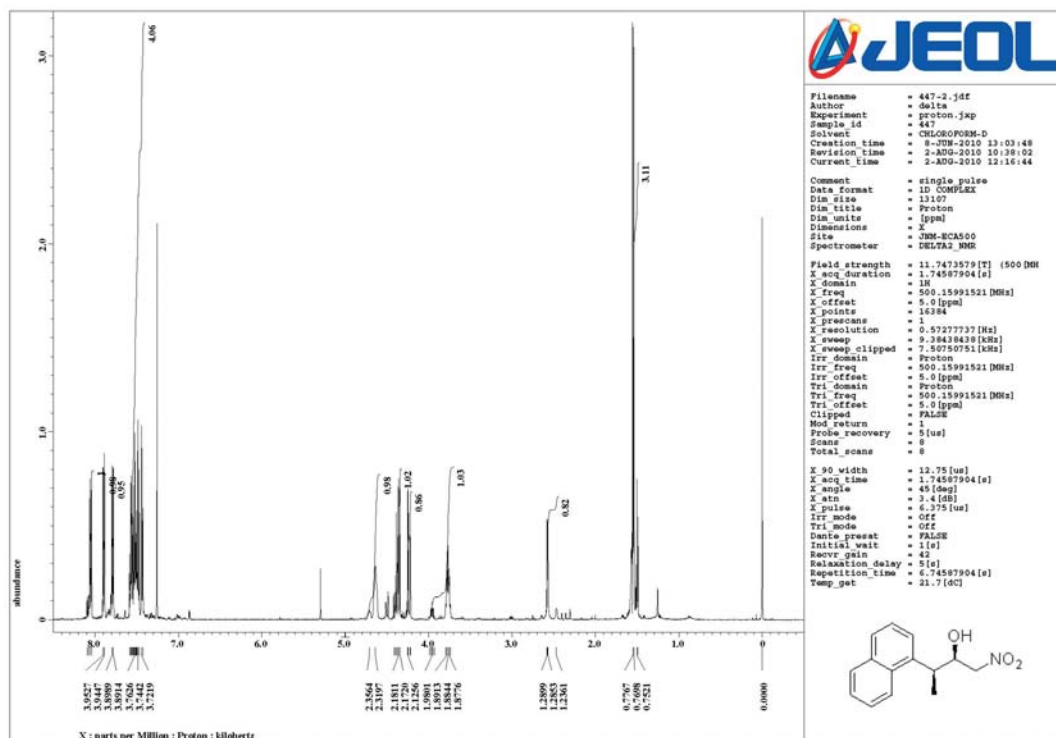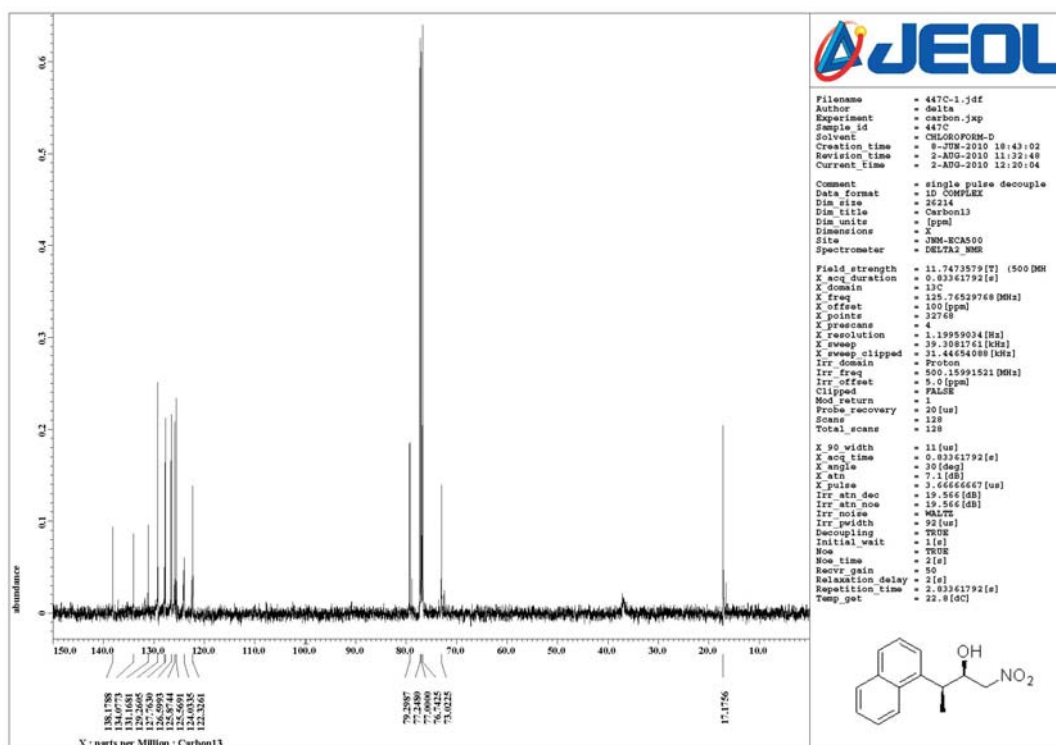

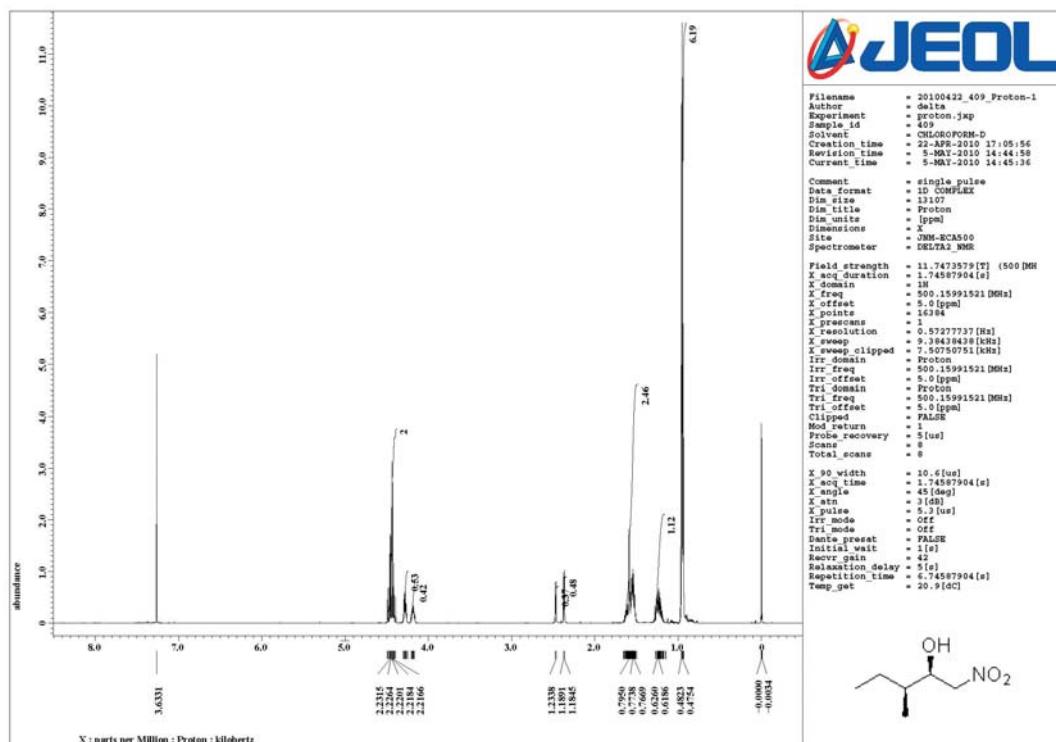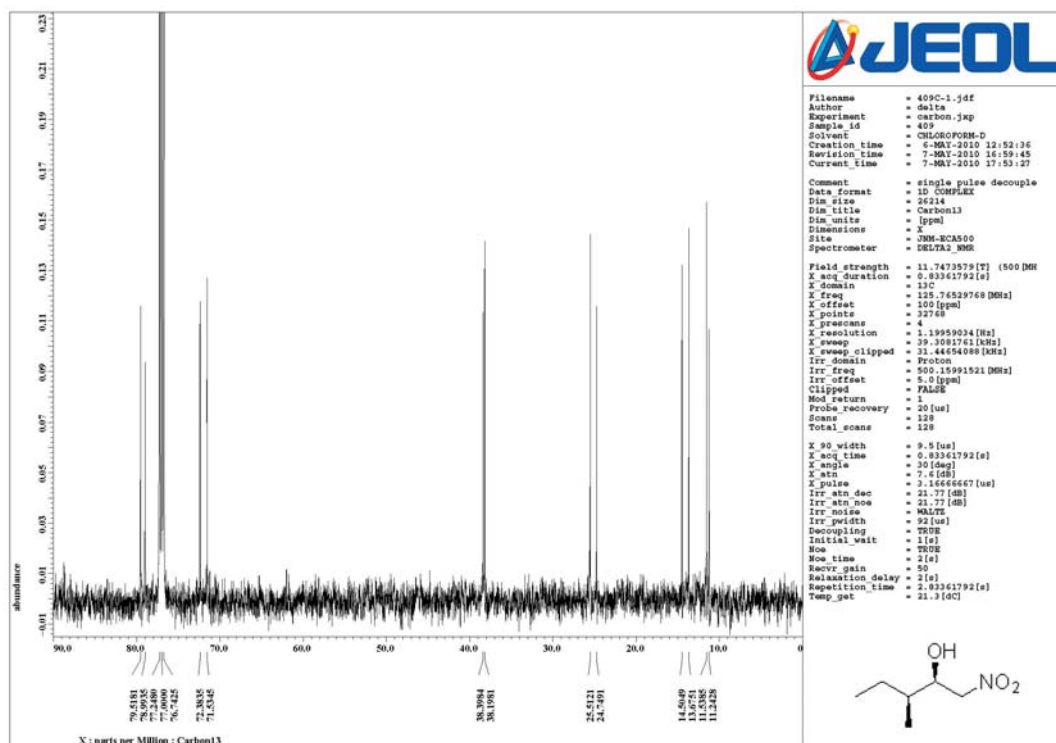



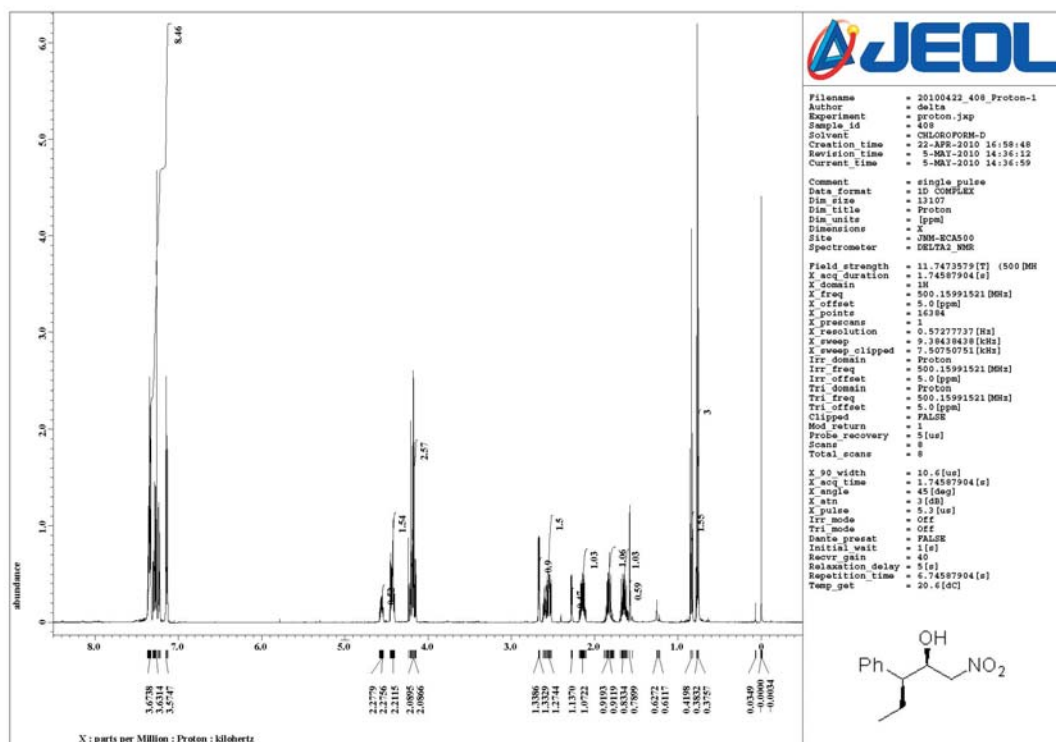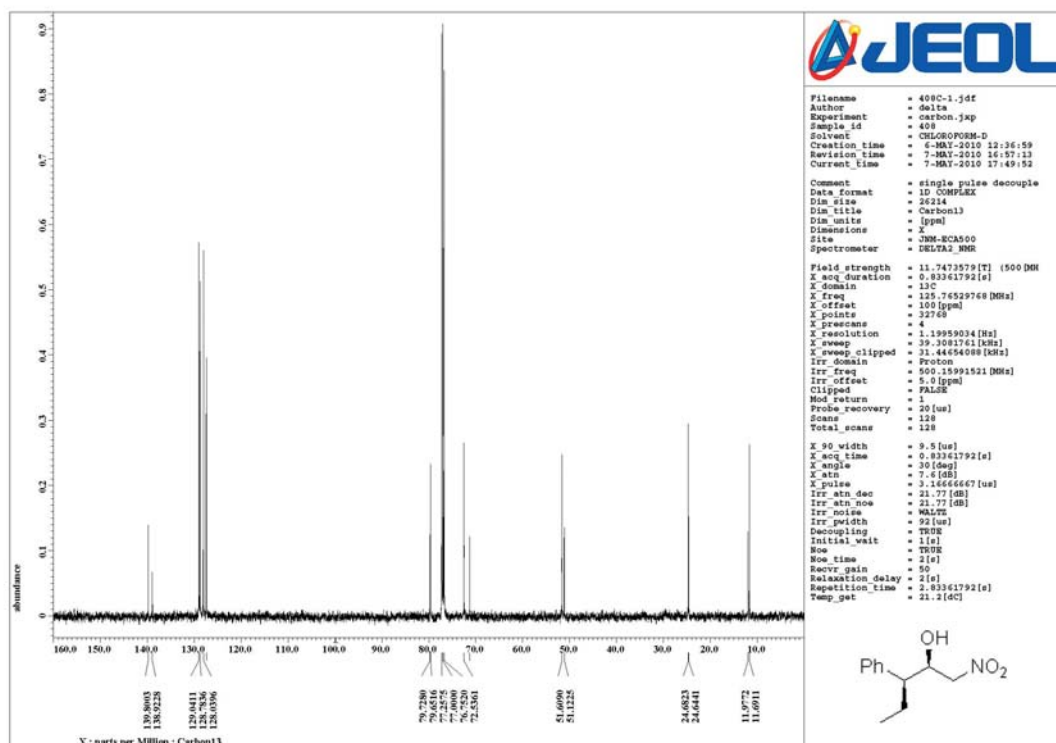

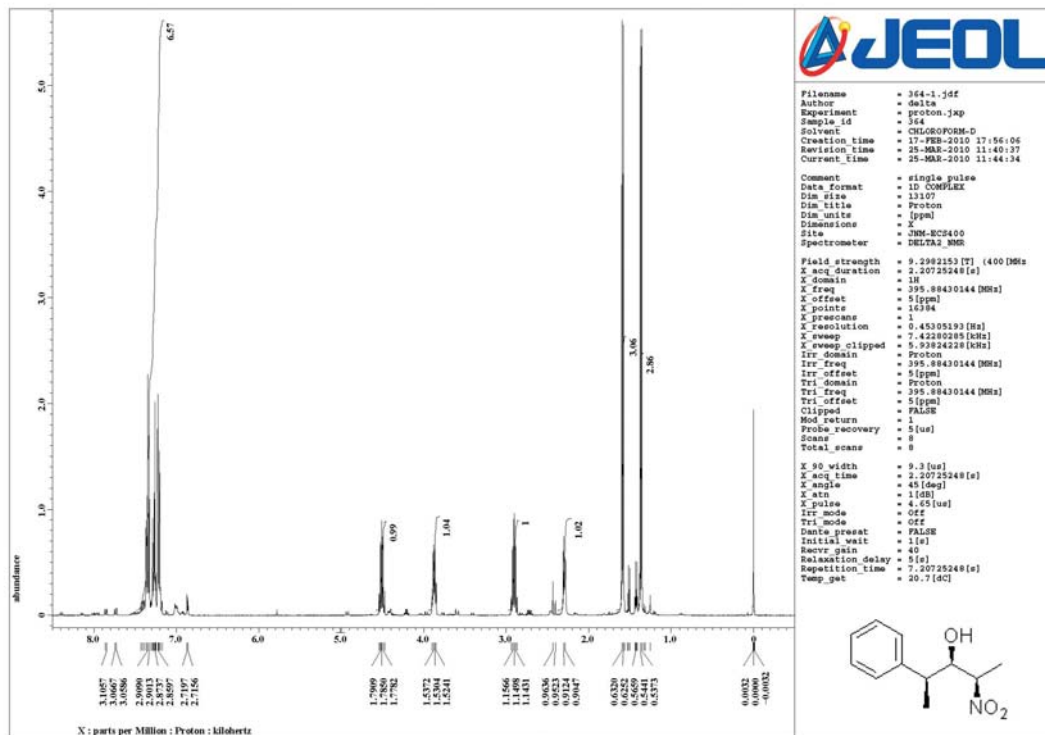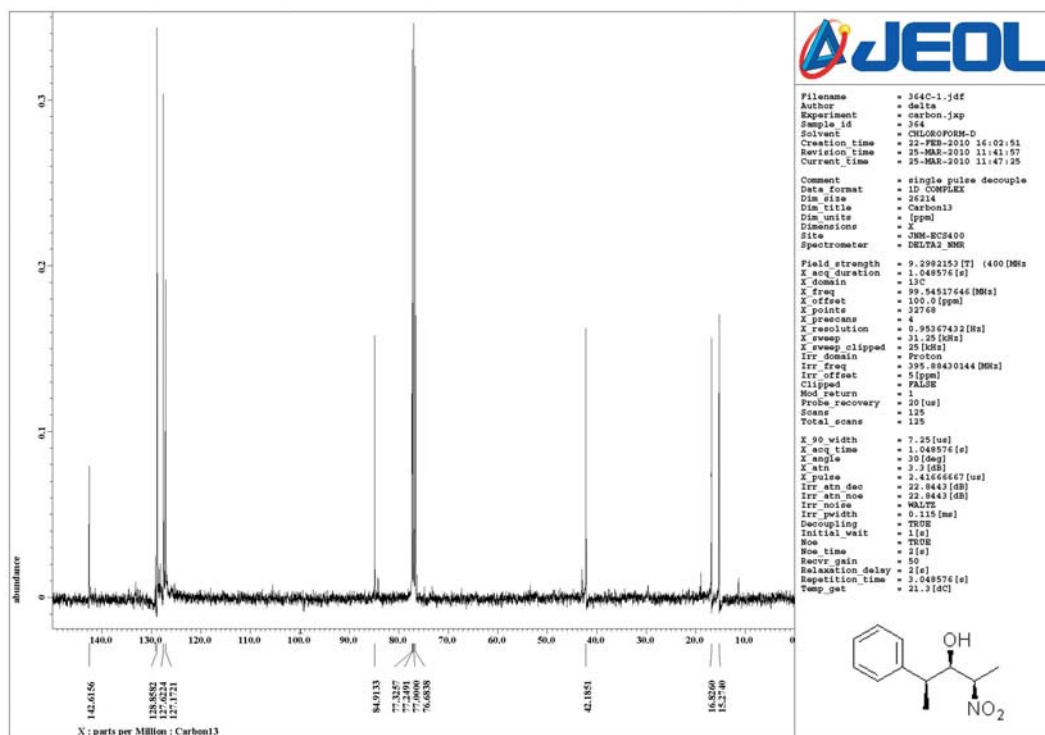

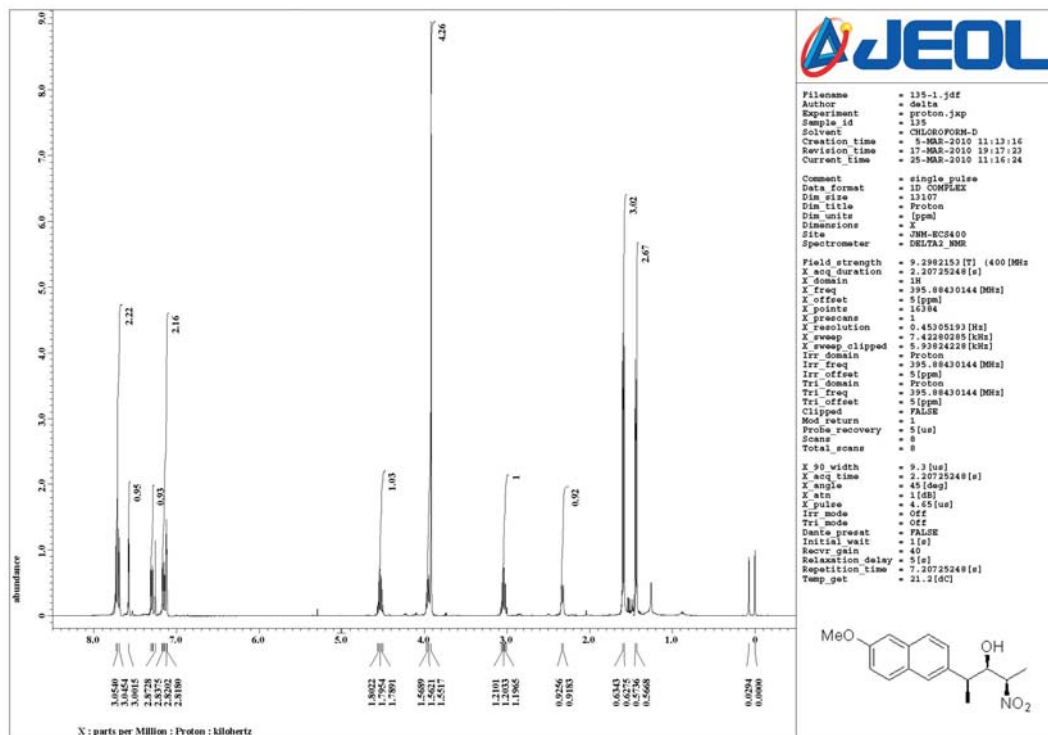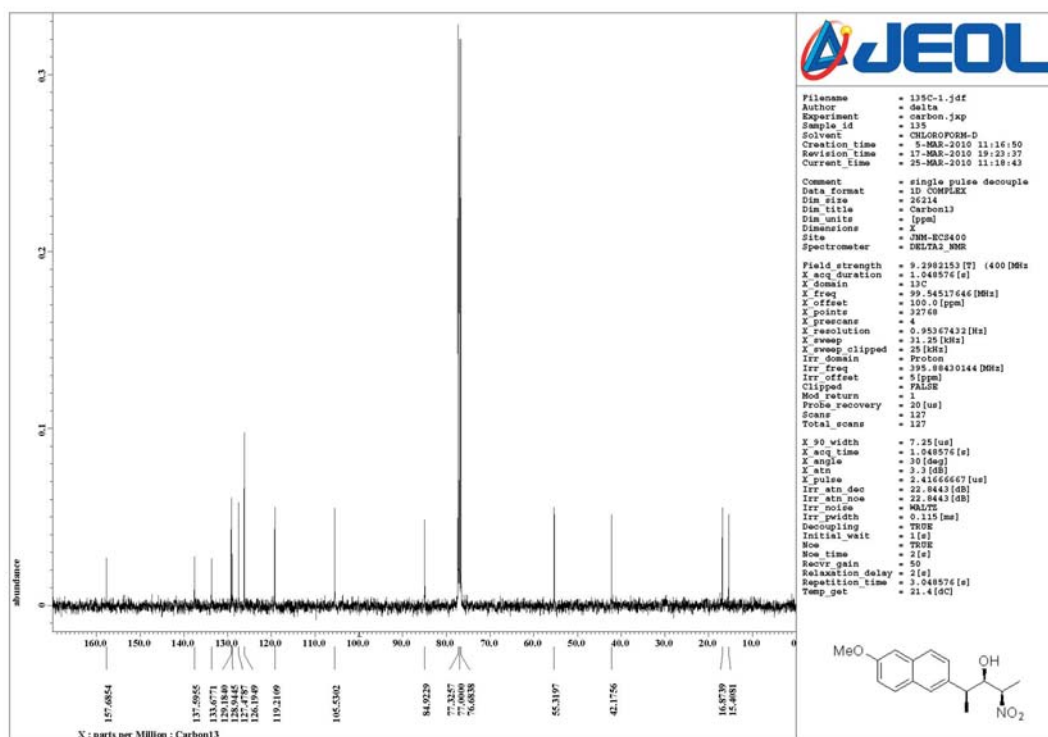

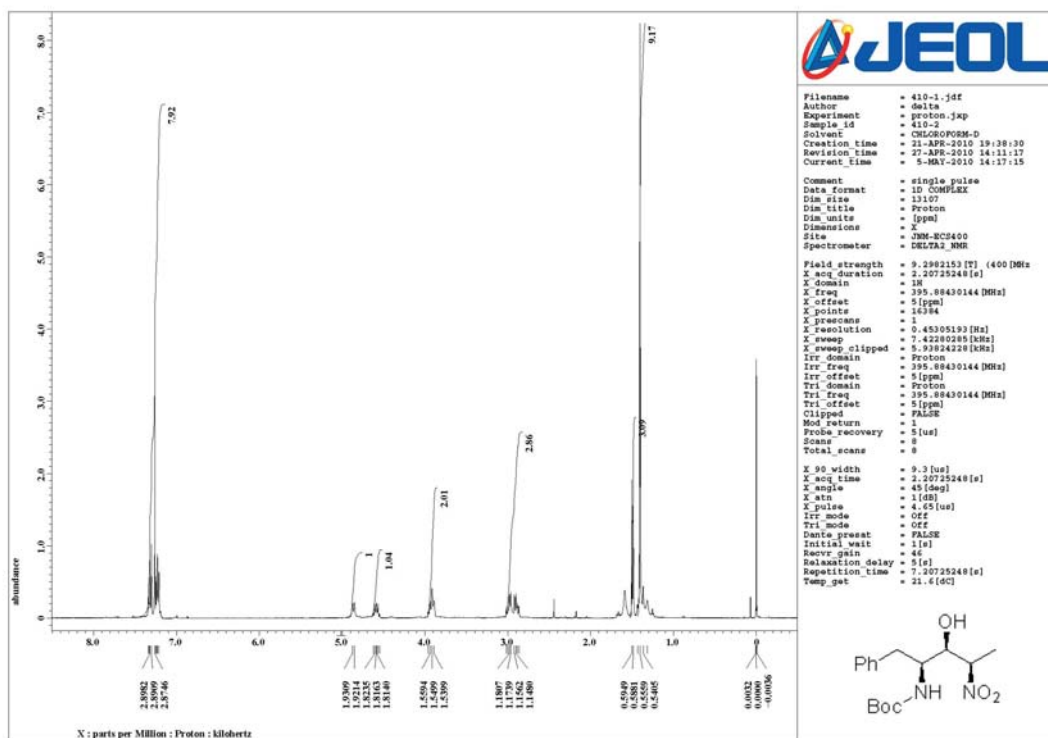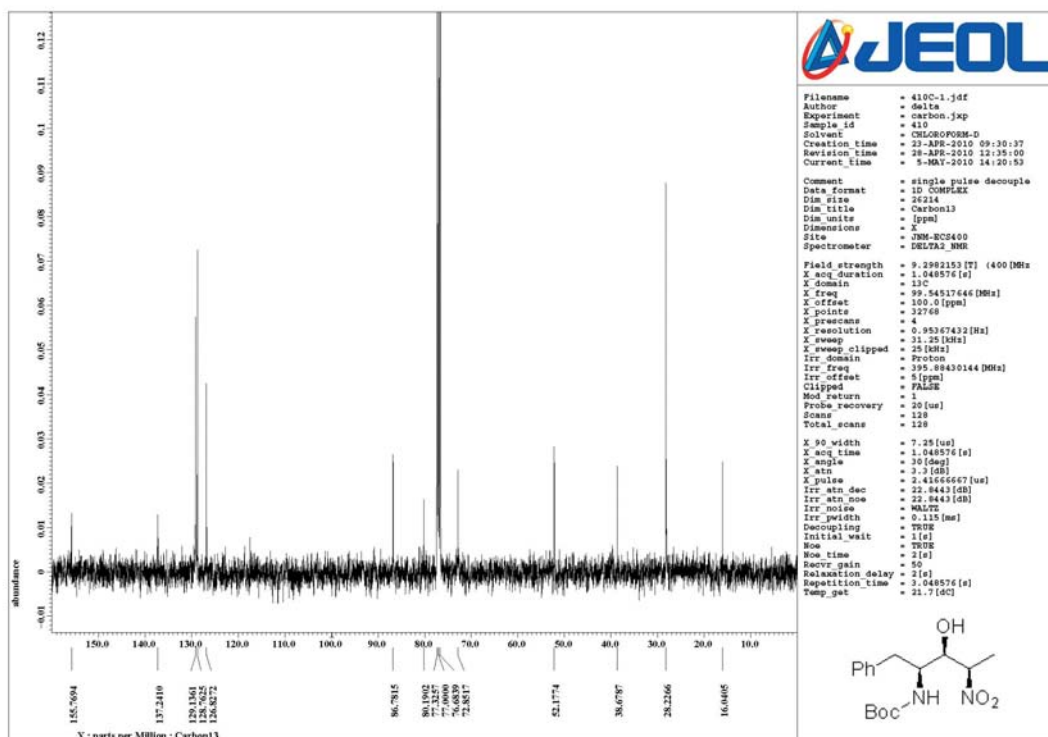

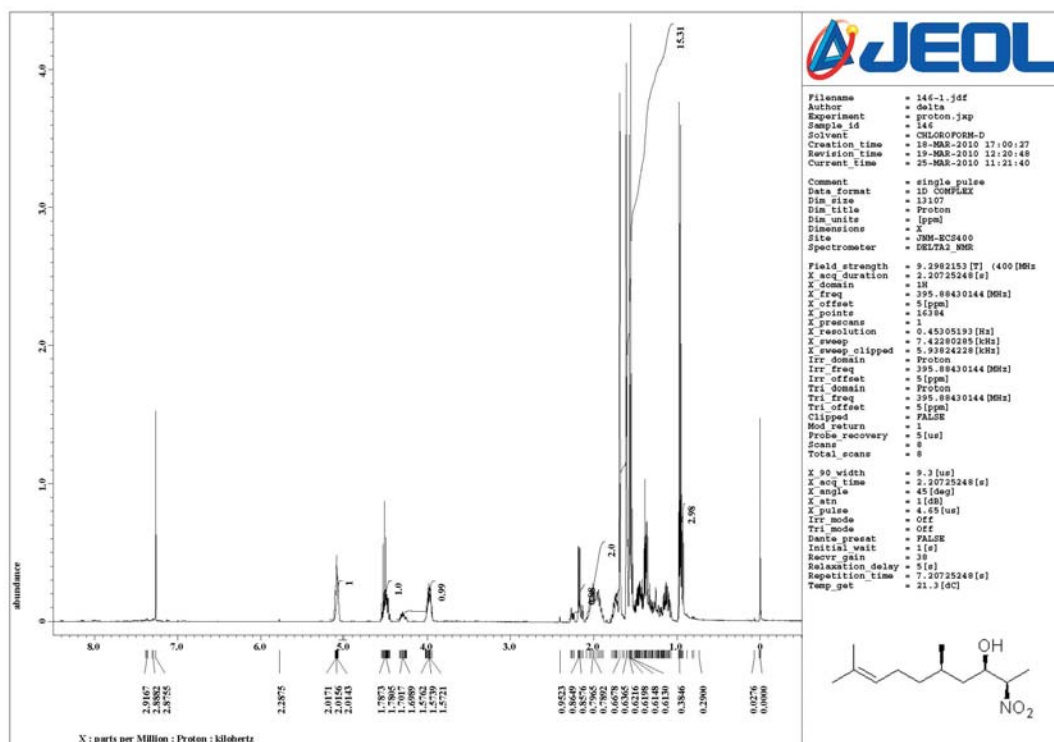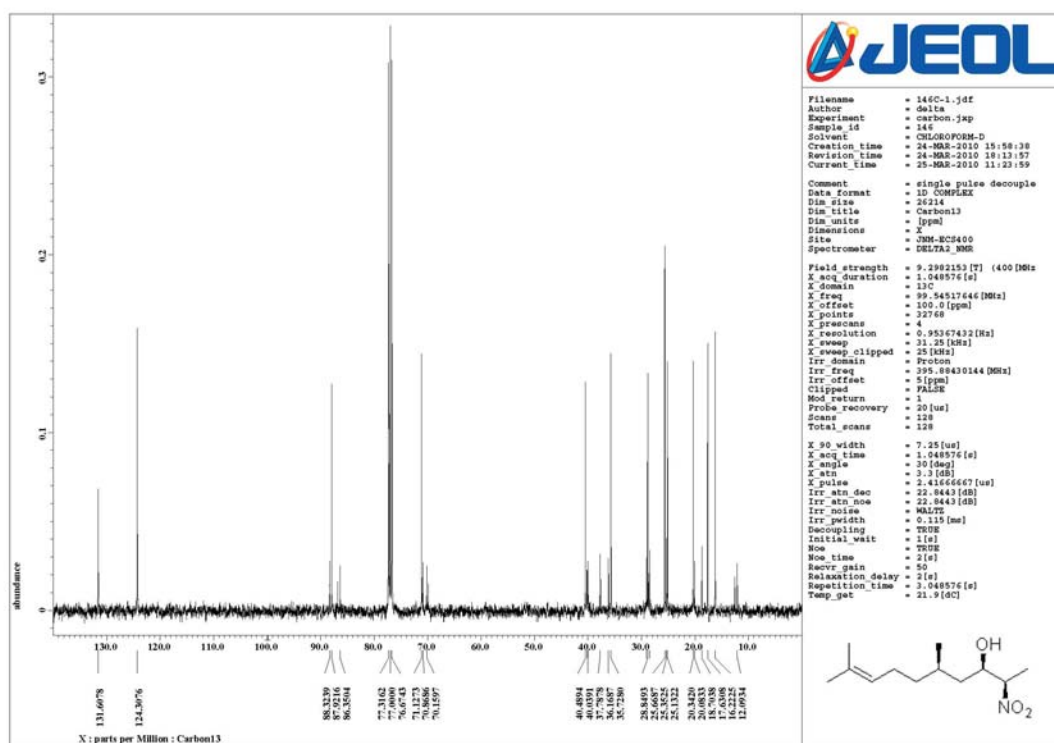

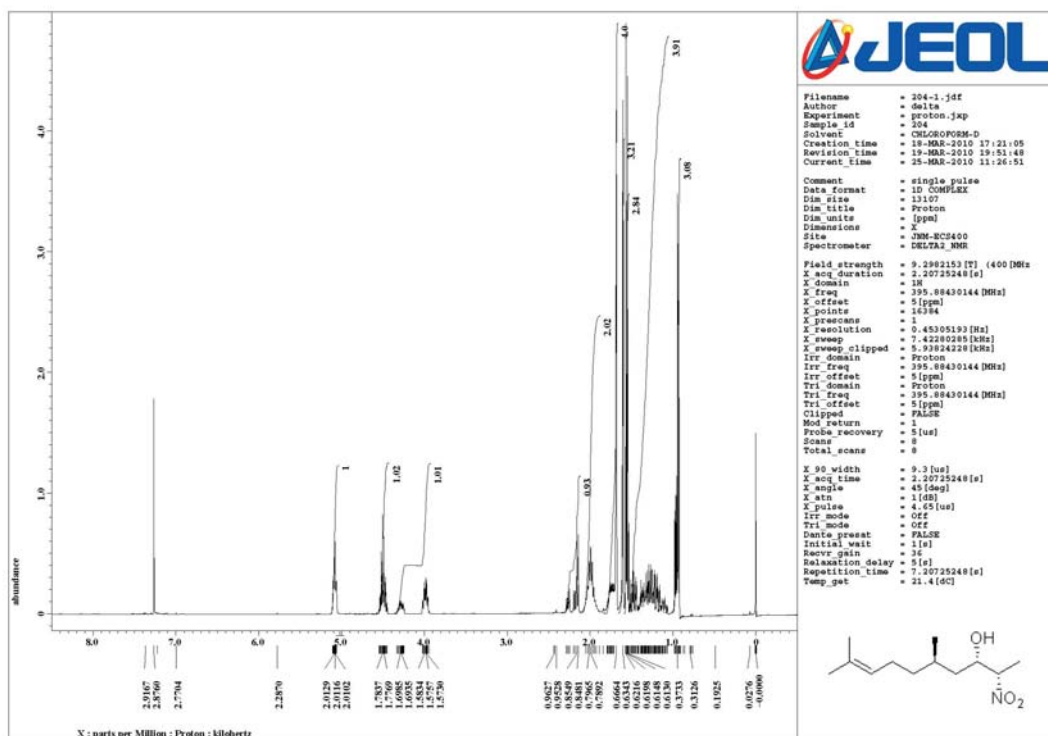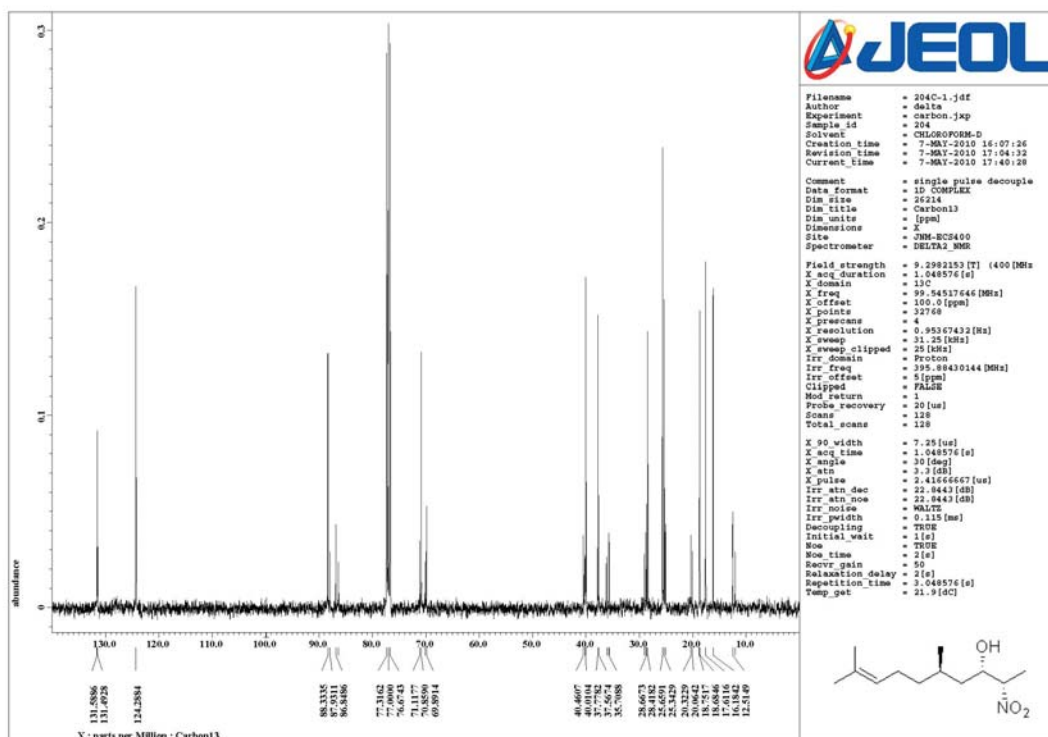



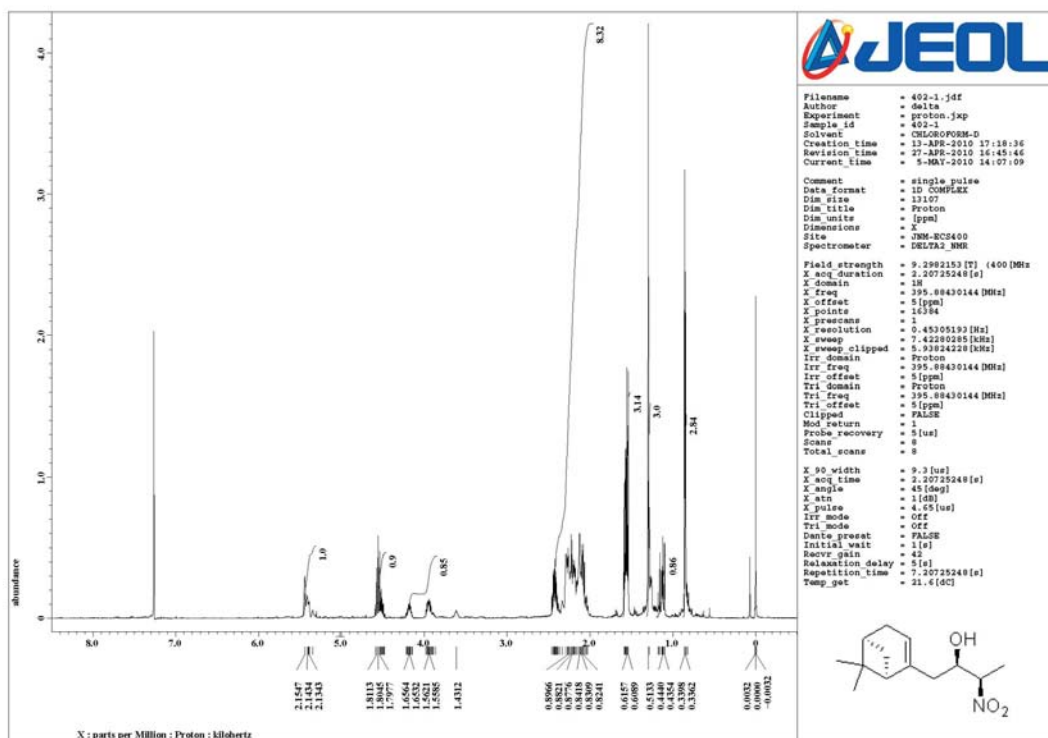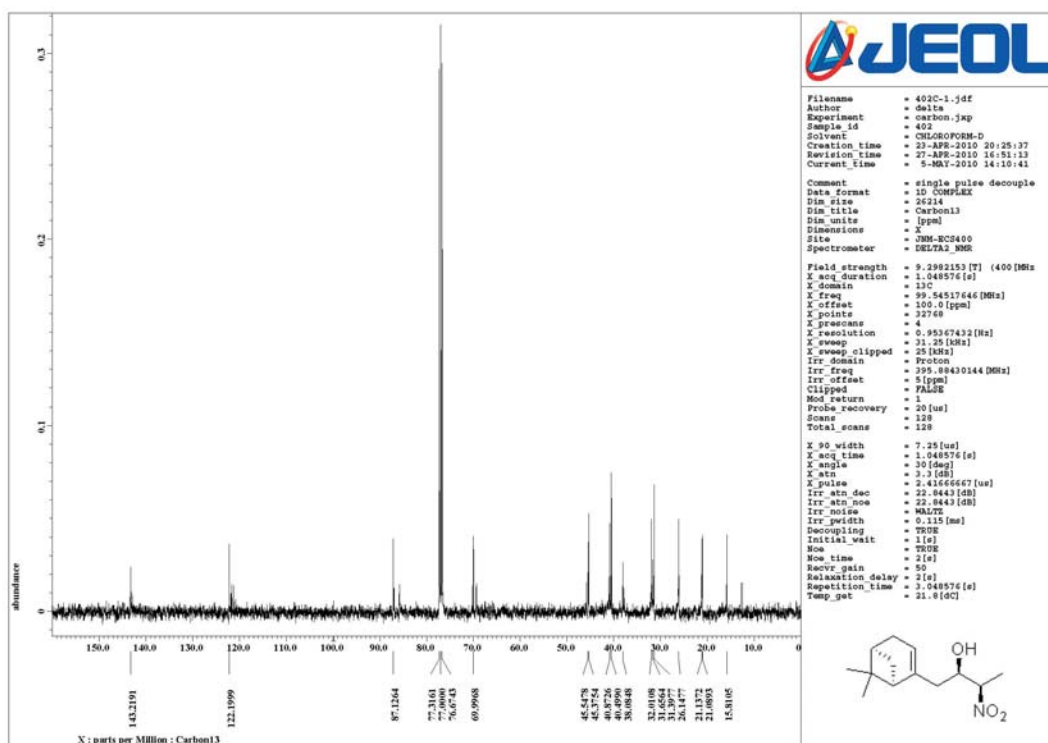

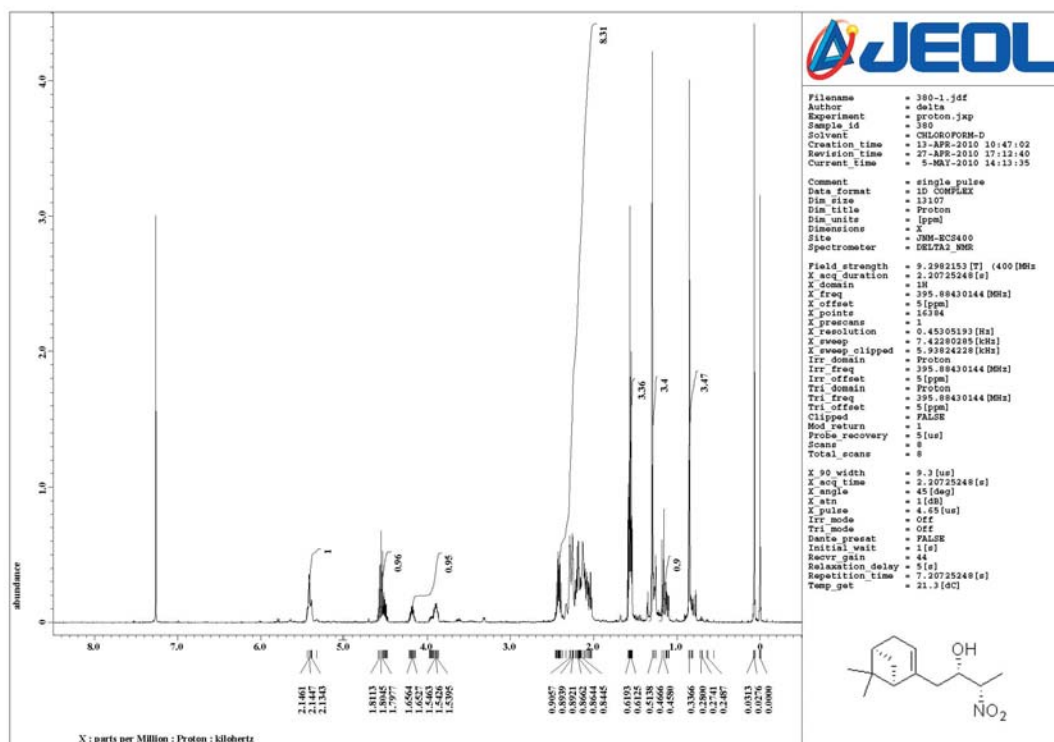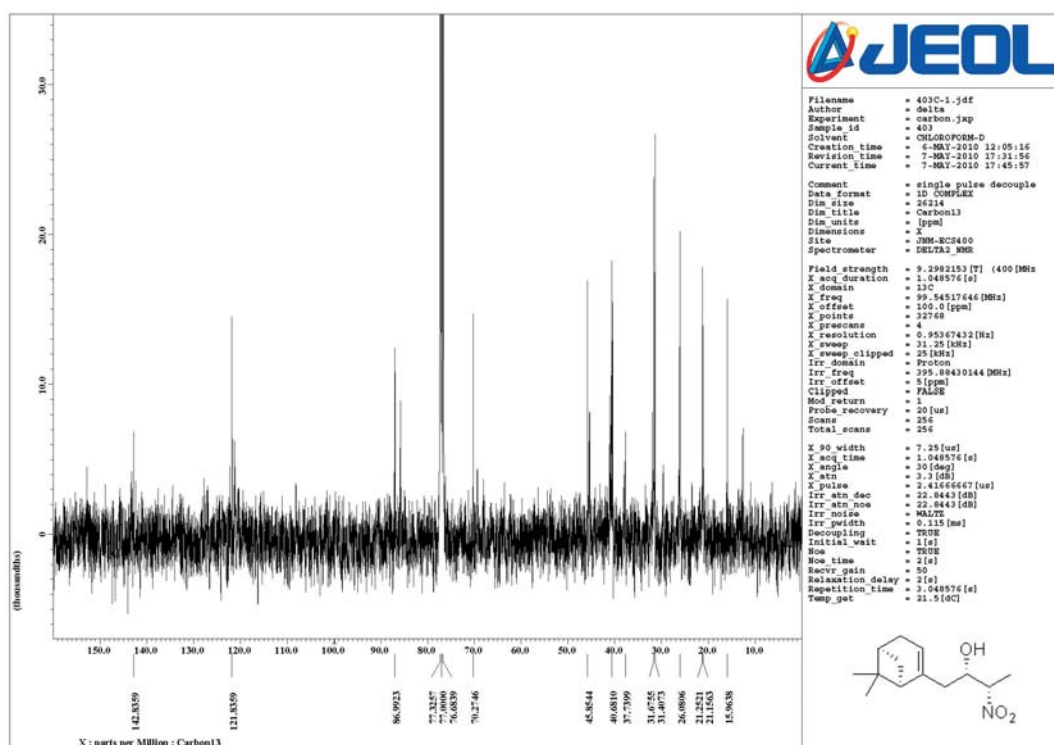

Supplement: c0cc03022h.pdf [file c0cc03022h.pdf]
